# Supplementary material for: H3K27me3 demethylases regulate flowering time response to low ambient temperature
Source: Research Square preprint supplement (doi:10.21203/rs.3.rs-5893753/v1), 2025-02-05
Supplement: Supplementary file 1 [file 6efcab12772f769b9cfd00f9.xlsx]

## Sheet: elf6-3
gene	baseMean	log2FoldChange	lfcSE	stat	pvalue	padj	tair_symbol
AT5G56370	19.4529	-6.82514	1.23047	-5.54678	2.90982e-08	1.29205e-06
AT3G43670	325.015	-5.97788	0.286756	-20.8466	1.63783e-96	8.16334e-93
AT2G34600	146.319	-4.54341	0.289335	-15.7029	1.44403e-55	1.79935e-52	JAZ7
AT3G22275	8.8901	-4.13688	0.974257	-4.24619	2.17434e-05	0.000601821
AT5G10140	15.1325	-3.66237	0.66696	-5.49113	3.99362e-08	1.74225e-06	FLC
AT5G64190	19.3974	-3.48318	0.597751	-5.82714	5.63838e-09	2.77561e-07
AT5G05060	299.466	-3.46338	0.168897	-20.5059	1.90679e-93	7.60314e-90
AT1G35140	282.962	-3.1671	0.198762	-15.9341	3.67282e-57	5.23036e-54	PHI-1
AT5G45340	175.152	-2.94153	0.214045	-13.7426	5.6411e-43	4.16543e-40	CYP707A3
AT5G23990	40.9507	-2.91394	0.438327	-6.64787	2.9736e-11	1.84688e-09	ATFRO5
AT5G57560	1318.69	-2.85416	0.132146	-21.5985	1.8558e-103	1.2333e-99	TCH4
AT1G02660	336.488	-2.84535	0.150718	-18.8787	1.70806e-79	5.6756e-76
AT1G74930	364.075	-2.72456	0.519188	-5.24774	1.53975e-07	6.11516e-06	ORA47
AT4G24570	314.206	-2.64728	0.176284	-15.0172	5.66862e-51	5.38168e-48	DIC2
AT4G26260	11.4187	-2.64485	0.655276	-4.03624	5.43155e-05	0.00135361	MIOX4
AT3G55980	2313.91	-2.60547	0.153017	-17.0274	5.14823e-65	9.33093e-62	SZF1
AT1G66090	312.204	-2.59516	0.17498	-14.8312	9.21004e-50	7.9835e-47
AT1G08090	8.64359	-2.5394	0.72074	-3.52333	0.000426163	0.00847946	ATNRT2:1
AT3G15500	83.9095	-2.5337	0.250825	-10.1014	5.44351e-24	1.12502e-21	ATNAC3
AT3G15450	3069.13	-2.51887	0.14553	-17.3082	4.07659e-67	8.1275e-64
AT4G17490	308.951	-2.48296	0.179402	-13.8402	1.45854e-43	1.16316e-40	ATERF6
AT1G80840	180.338	-2.45997	0.222165	-11.0727	1.70105e-28	5.74811e-26	WRKY40
AT1G50750	22.4857	-2.44575	0.447696	-5.46299	4.68194e-08	2.03807e-06
AT1G70290	1746	-2.3876	0.109821	-21.7407	8.45322e-105	8.4266e-101	ATTPS8
AT1G21910	297.375	-2.37574	0.156567	-15.174	5.26104e-52	5.24447e-49	DREB26
AT5G57220	185.996	-2.37254	0.21604	-10.9819	4.6681e-28	1.43181e-25	CYP81F2
AT2G38470	1120.43	-2.31325	0.123861	-18.6761	7.741e-78	2.20475e-74	WRKY33
AT4G37260	1776.94	-2.30413	0.167437	-13.7612	4.36299e-43	3.34557e-40	MYB73
AT2G41100	1595.78	-2.28492	0.134845	-16.9447	2.10449e-64	3.49643e-61	TCH3
AT3G47340	55.385	-2.27467	0.388991	-5.84761	4.98682e-09	2.46095e-07	ASN1
AT3G50060	938.052	-2.26216	0.40049	-5.64849	1.61863e-08	7.43563e-07	MYB77
AT5G08150	44.9615	-2.25607	0.317242	-7.11151	1.14781e-12	8.35181e-11	SOB5
AT4G32480	860.927	-2.21391	0.13957	-15.8623	1.15516e-56	1.53536e-53
AT5G48430	8.88398	-2.20891	0.689161	-3.20521	0.00134962	0.0223668
AT1G33055	53.2533	-2.20585	0.320544	-6.88158	5.91928e-12	4.04153e-10
AT1G02610	74.2675	-2.19576	0.256227	-8.56958	1.03862e-17	1.25497e-15
AT4G22710	9.62273	-2.17811	0.647302	-3.3649	0.000765708	0.0139415	CYP706A2
AT5G46710	145.795	-2.1708	0.210621	-10.3066	6.57563e-25	1.44064e-22
AT4G08040	61.8084	-2.16785	0.271495	-7.98487	1.40675e-15	1.3816e-13	ACS11
AT5G22920	1364.47	-2.16395	0.11696	-18.5016	2.00479e-76	4.99619e-73
AT4G08950	1705.42	-2.14704	0.131922	-16.2751	1.48318e-59	2.27463e-56	EXO
AT1G75490	32.7017	-2.14309	0.370693	-5.78131	7.41224e-09	3.59557e-07
AT4G35770	326.066	-2.12534	0.183197	-11.6014	4.05574e-31	1.68457e-28	SEN1
AT5G20230	139.885	-2.09715	0.206549	-10.1533	3.20479e-24	6.87031e-22	ATBCB
AT5G35940	43.2993	-2.08883	0.344542	-6.06262	1.33918e-09	6.98931e-08
AT2G18700	702.707	-2.08663	0.140512	-14.8502	6.93617e-50	6.28575e-47	ATTPS11
AT3G19680	648.247	-2.06401	0.17402	-11.8608	1.89248e-32	9.43261e-30
AT5G44260	42.3721	-2.05466	0.32952	-6.2353	4.50912e-10	2.45624e-08
AT1G07135	680.424	-2.04178	0.348581	-5.85741	4.70148e-09	2.33749e-07
AT1G25400	403.383	-2.0355	0.133184	-15.2834	9.86681e-53	1.03534e-49
AT1G72520	324.923	-2.03454	0.152255	-13.3627	9.989e-41	6.63836e-38	LOX4
AT2G29300	204.433	-2.00569	0.16248	-12.3442	5.23553e-35	2.8211e-32
AT1G50745	17.399	-1.99568	0.48552	-4.1104	3.94979e-05	0.00101217
AT5G04150	64.7535	-1.98992	0.66978	-2.97101	0.0029682	0.0426038	BHLH101
AT3G56400	754.254	-1.97915	0.364097	-5.43577	5.45593e-08	2.31929e-06	WRKY70
AT4G27280	1072.39	-1.97571	0.427238	-4.62438	3.75718e-06	0.0001218
AT2G40000	2683.34	-1.96884	0.127576	-15.4328	9.85393e-54	1.09143e-50	HSPRO2
AT1G50040	48.1689	-1.95864	0.296005	-6.61691	3.6679e-11	2.25006e-09
AT4G37290	12.067	-1.89892	0.606169	-3.13265	0.00173233	0.0276079
AT5G47220	605.077	-1.89873	0.161465	-11.7594	6.31748e-32	2.92911e-29	ATERF2
AT1G27730	705.033	-1.89132	0.41125	-4.59897	4.24594e-06	0.000136534	STZ
AT2G26150	80.4881	-1.87301	0.240715	-7.78101	7.19454e-15	6.61002e-13	ATHSFA2
AT5G27420	210.388	-1.87218	0.171641	-10.9075	1.06102e-27	3.11083e-25	CNI1
AT5G26920	252.923	-1.87192	0.154545	-12.1125	9.07348e-34	4.63841e-31	CBP60G
AT1G17380	60.5416	-1.86714	0.272655	-6.84802	7.48779e-12	5.04338e-10	JAZ5
AT2G28120	197.932	-1.8552	0.184726	-10.043	9.86559e-24	1.94743e-21
AT2G25735	158.714	-1.8533	0.175692	-10.5486	5.15714e-26	1.23877e-23
AT4G27450	215.356	-1.85226	0.228216	-8.11626	4.80769e-16	4.96637e-14
AT2G27690	45.9996	-1.84966	0.295075	-6.26846	3.64634e-10	2.00267e-08	CYP94C1
AT1G80440	1951.98	-1.83076	0.103107	-17.7558	1.55379e-70	3.442e-67
AT5G61600	1361.71	-1.8012	0.374828	-4.80541	1.54438e-06	5.31785e-05	ERF104
AT4G17500	770.611	-1.79761	0.157329	-11.4258	3.10699e-30	1.23888e-27	ATERF-1
AT4G37610	1652.66	-1.79629	0.114512	-15.6865	1.86981e-55	2.19285e-52	BT5
AT1G15040	33.2777	-1.79505	0.34826	-5.15433	2.54538e-07	9.83474e-06
AT1G05675	32.908	-1.77455	0.347487	-5.10679	3.27675e-07	1.24911e-05
AT4G36850	571.095	-1.76994	0.161067	-10.9889	4.32367e-28	1.34689e-25
AT4G29780	178.54	-1.75544	0.166886	-10.5188	7.07838e-26	1.64095e-23
AT1G68840	1990.07	-1.73546	0.13361	-12.9889	1.41407e-38	8.8101e-36	RAV2
AT3G44120	14.4444	-1.7324	0.505082	-3.42994	0.000603711	0.0114195
AT2G39650	234.322	-1.73021	0.202465	-8.54573	1.27721e-17	1.5157e-15
AT2G20670	2322.37	-1.71792	0.122478	-14.0263	1.07596e-44	8.93805e-42
AT1G24140	42.7742	-1.71061	0.310662	-5.50634	3.66373e-08	1.6089e-06
AT4G11280	1150.8	-1.71026	0.157256	-10.8757	1.50535e-27	4.28745e-25	ACS6
AT1G65970	27.8802	-1.7083	0.376345	-4.53918	5.64747e-06	0.000177034	TPX2
AT1G78410	10.8166	-1.70605	0.577415	-2.95464	0.00313036	0.0442938
AT1G72940	544.937	-1.68593	0.182033	-9.26168	2.0125e-20	3.18438e-18
AT5G45630	13.341	-1.68382	0.54975	-3.06289	0.00219212	0.0335928
AT5G20250	7740.85	-1.65607	0.154715	-10.704	9.74812e-27	2.524e-24	DIN10
AT2G06995	15.1069	-1.64931	0.51173	-3.22301	0.00126849	0.0212878
AT1G33610	116.789	-1.63159	0.219931	-7.41867	1.18299e-13	9.51022e-12
AT1G13260	1310.98	-1.62429	0.11865	-13.6897	1.16975e-42	8.32906e-40	RAV1
AT1G13700	85.5057	-1.62351	0.229316	-7.07978	1.44384e-12	1.03547e-10	PGL1
AT1G20510	830.686	-1.61616	0.125966	-12.8302	1.11094e-37	6.71177e-35	OPCL1
AT1G51620	16.1368	-1.60901	0.488124	-3.29631	0.00097963	0.0171474
AT4G26200	47.8445	-1.60288	0.349792	-4.58237	4.59746e-06	0.000147126	ACS7
AT5G49360	2376.22	-1.60094	0.175439	-9.12533	7.15149e-20	1.05614e-17	BXL1
AT3G62950	35.7883	-1.59913	0.340725	-4.69332	2.68802e-06	8.94674e-05
AT3G20395	28.5997	-1.59231	0.370922	-4.29283	1.76407e-05	0.000498868
AT1G12030	52.8812	-1.58238	0.333966	-4.73816	2.15668e-06	7.27541e-05
AT4G27410	445.437	-1.55128	0.14553	-10.6595	1.57393e-26	3.97209e-24	RD26
AT1G52040	164.061	-1.5481	0.245673	-6.30148	2.94809e-10	1.64179e-08	MBP1
AT1G57990	750.602	-1.54083	0.121979	-12.632	1.40723e-36	8.01599e-34	ATPUP18
AT3G55840	21.496	-1.52334	0.410021	-3.71526	0.000202991	0.0044424
AT2G39330	19.1743	-1.51914	0.521847	-2.91109	0.00360171	0.0496593	JAL23
AT5G67300	1742.25	-1.5116	0.115101	-13.1328	2.13744e-39	1.37465e-36	ATMYBR1
AT5G41080	681.21	-1.50732	0.142592	-10.5709	4.06702e-26	1.00104e-23
AT5G25260	24.8815	-1.49622	0.407719	-3.66975	0.00024279	0.0051881
AT5G61440	887.102	-1.49198	0.128045	-11.652	2.24187e-31	9.71658e-29	ACHT5
AT1G23390	3424.25	-1.49028	0.130607	-11.4104	3.70955e-30	1.45014e-27
AT3G02550	141.494	-1.48832	0.287514	-5.17653	2.26056e-07	8.81972e-06	LBD41
AT4G13340	2600.22	-1.48755	0.185857	-8.00377	1.20667e-15	1.19689e-13
AT2G32030	39.0765	-1.48017	0.320272	-4.6216	3.80786e-06	0.000123242
AT1G24530	252.77	-1.46279	0.184332	-7.93558	2.0951e-15	2.02767e-13
AT4G13575	122.735	-1.45568	0.192226	-7.57273	3.65455e-14	3.14055e-12
AT1G28370	31.4745	-1.44885	0.380202	-3.81074	0.000138549	0.00316772	ERF11
AT5G25190	55.4848	-1.44074	0.273286	-5.2719	1.35018e-07	5.41619e-06
AT3G50480	281.447	-1.42223	0.1609	-8.83922	9.63912e-19	1.28117e-16	HR4
AT3G04640	138.299	-1.42137	0.186783	-7.60975	2.74624e-14	2.39091e-12
AT3G49790	430.384	-1.42103	0.162429	-8.74865	2.15929e-18	2.79543e-16
AT3G46600	3094.22	-1.41148	0.124066	-11.3769	5.4528e-30	2.09063e-27
AT5G11330	1102.79	-1.40462	0.146	-9.62071	6.53808e-22	1.1141e-19
AT1G76650	98.905	-1.40334	0.203069	-6.91068	4.82323e-12	3.3045e-10	CML38
AT2G19800	914.158	-1.38626	0.18717	-7.40642	1.29753e-13	1.03476e-11	MIOX2
AT4G13572	25.3063	-1.38584	0.383878	-3.61011	0.000306064	0.00635898
AT2G23290	271.281	-1.38353	0.140194	-9.86874	5.68767e-23	1.05977e-20	AtMYB70
AT2G01300	33.1813	-1.38282	0.336317	-4.11165	3.92841e-05	0.00100799
AT3G02170	823.637	-1.37724	0.132723	-10.3768	3.16218e-25	7.24647e-23	LNG2
AT2G24600	196.984	-1.36765	0.195201	-7.00637	2.4458e-12	1.71697e-10
AT3G15630	775.407	-1.35837	0.126221	-10.7618	5.21404e-27	1.38603e-24
AT1G05575	49.7263	-1.354	0.27855	-4.8609	1.16852e-06	4.10156e-05
AT2G26530	386.783	-1.34318	0.189516	-7.08739	1.36665e-12	9.83643e-11	AR781
AT1G35210	61.094	-1.33978	0.308022	-4.34961	1.3638e-05	0.000392354
AT5G41740	512.28	-1.33439	0.14068	-9.48523	2.41838e-21	3.98473e-19
AT5G17490	65.3148	-1.33354	0.241615	-5.51927	3.40413e-08	1.50484e-06	RGL3
AT1G14250	434.092	-1.33233	0.181117	-7.3562	1.89221e-13	1.4911e-11
AT5G47230	335.832	-1.33219	0.197322	-6.75134	1.4649e-11	9.36082e-10	ERF5
AT1G30720	64.2176	-1.33137	0.264707	-5.02961	4.91467e-07	1.8349e-05
AT5G25240	183.849	-1.32761	0.166307	-7.9829	1.42934e-15	1.3969e-13
AT1G71030	334.328	-1.32611	0.135134	-9.81325	9.87407e-23	1.80605e-20	ATMYBL2
AT4G34150	1593.17	-1.32523	0.119712	-11.0701	1.7519e-28	5.82128e-26
AT2G36770	48.8229	-1.32441	0.298321	-4.43956	9.01439e-06	0.000270663
AT3G21720	28.2702	-1.32294	0.356585	-3.71004	0.000207226	0.00451525	ICL
AT1G32920	993.245	-1.30587	0.158662	-8.23052	1.86395e-16	2.04185e-14
AT1G72910	623.262	-1.2967	0.385819	-3.36091	0.000776866	0.0140932
AT5G05410	298.615	-1.29359	0.137602	-9.40096	5.40681e-21	8.76387e-19	DREB2A
AT4G23180	695.969	-1.29091	0.117413	-10.9946	4.0561e-28	1.28359e-25	CRK10
AT2G17230	766.05	-1.28626	0.116836	-11.0092	3.45179e-28	1.10997e-25	EXL5
AT2G23810	1632.69	-1.28492	0.12062	-10.6526	1.69517e-26	4.22458e-24	TET8
AT1G18570	291.535	-1.28377	0.139054	-9.23217	2.65193e-20	4.13059e-18	MYB51
AT5G19120	3138.74	-1.27807	0.093966	-13.6015	3.92549e-42	2.69871e-39
AT1G73500	736.402	-1.2738	0.171308	-7.43573	1.03989e-13	8.39367e-12	ATMKK9
AT4G24110	34.4176	-1.26844	0.363854	-3.48612	0.000490074	0.00956028
AT5G02020	199.585	-1.26701	0.163242	-7.76153	8.39112e-15	7.60426e-13	SIS
AT1G28330	1384.33	-1.26155	0.151553	-8.32416	8.49296e-17	9.51259e-15	DYL1
AT5G06870	410.441	-1.25994	0.127742	-9.86319	6.01113e-23	1.10967e-20	PGIP2
AT1G49130	298.259	-1.25953	0.161694	-7.7896	6.72203e-15	6.23336e-13
AT1G67970	201.306	-1.25317	0.162193	-7.72644	1.10597e-14	9.93231e-13	AT-HSFA8
AT1G72450	980.747	-1.25116	0.106175	-11.7839	4.72296e-32	2.29663e-29	JAZ6
AT3G07350	747.964	-1.24713	0.127941	-9.74764	1.888e-22	3.39109e-20
AT2G26190	953.25	-1.24536	0.105734	-11.7783	5.05264e-32	2.39844e-29
AT1G72920	380.397	-1.24468	0.372862	-3.33818	0.000843279	0.0151055
AT1G72900	1217.75	-1.23518	0.113836	-10.8505	1.98239e-27	5.4893e-25
AT5G44572	85.0948	-1.22039	0.240734	-5.06946	3.98939e-07	1.50069e-05
AT4G13560	27.354	-1.2172	0.362347	-3.3592	0.000781675	0.0141675	UNE15
AT1G78830	3201.5	-1.21645	0.138024	-8.81334	1.21472e-18	1.59328e-16
AT2G25900	522.011	-1.19982	0.148965	-8.05438	7.98829e-16	8.0844e-14	ATCTH
AT5G54490	62.7658	-1.19785	0.277753	-4.31265	1.61313e-05	0.000459441	PBP1
AT2G17880	85.0587	-1.19774	0.219539	-5.45572	4.87761e-08	2.10943e-06
AT3G57520	6380.2	-1.19105	0.168276	-7.07794	1.46311e-12	1.04552e-10	AtSIP2
AT3G10040	111.49	-1.19026	0.283586	-4.19717	2.70276e-05	0.000728175
AT3G16720	479.882	-1.18616	0.138346	-8.57385	1.00084e-17	1.21669e-15	ATL2
AT1G36370	4947.79	-1.17551	0.103443	-11.3639	6.32639e-30	2.3798e-27	SHM7
AT3G17520	36.0315	-1.16475	0.317715	-3.66603	0.000246345	0.0052472
AT1G52000	880.282	-1.1622	0.135034	-8.60675	7.51619e-18	9.19327e-16
AT1G15550	75.6614	-1.16195	0.270029	-4.30307	1.68444e-05	0.000477706	GA4
AT1G24145	58.1584	-1.1616	0.257745	-4.50679	6.58173e-06	0.000203758
AT2G28630	403.87	-1.16073	0.140734	-8.24767	1.61507e-16	1.77899e-14	KCS12
AT5G62020	403.401	-1.16034	0.144332	-8.03941	9.02719e-16	9.08965e-14	AT-HSFB2A
AT2G24550	647.309	-1.1481	0.127408	-9.01117	2.0387e-19	2.84234e-17
AT5G22250	107.81	-1.14107	0.196083	-5.81931	5.90924e-09	2.88756e-07
AT3G24500	268.061	-1.13635	0.155148	-7.32425	2.40246e-13	1.87835e-11	MBF1C
AT1G10070	35.0275	-1.13505	0.326067	-3.48104	0.000499463	0.00966777	ATBCAT-2
AT1G26800	273.935	-1.1343	0.187039	-6.06454	1.32328e-09	6.92446e-08
AT5G04720	1306.5	-1.13009	0.113032	-9.99798	1.55535e-23	3.0401e-21	ADR1-L2
AT3G06070	547.636	-1.12792	0.130624	-8.63488	5.87896e-18	7.28005e-16
AT5G19190	746.52	-1.12486	0.114748	-9.80289	1.09413e-22	1.98307e-20
AT2G40140	1585.57	-1.12243	0.121658	-9.22605	2.80785e-20	4.33955e-18	CZF1
AT4G31800	224.374	-1.11904	0.148476	-7.53683	4.81529e-14	4.01684e-12	WRKY18
AT2G02710	815.913	-1.11353	0.122852	-9.064	1.25757e-19	1.79088e-17	PLP
AT5G41750	86.6188	-1.11298	0.246872	-4.50834	6.5338e-06	0.000202588
AT2G25200	238.998	-1.11008	0.148756	-7.46243	8.49389e-14	6.88385e-12
AT3G56980	97.9357	-1.10968	0.308171	-3.60085	0.000317179	0.0065394	BHLH039
AT4G33980	375.187	-1.10686	0.142817	-7.75023	9.17292e-15	8.27513e-13
AT5G42200	157.243	-1.10396	0.171273	-6.44562	1.15128e-10	6.71141e-09
AT3G19580	110.463	-1.10378	0.208872	-5.28447	1.26068e-07	5.06737e-06	AZF2
AT1G22890	132.33	-1.10092	0.244649	-4.50002	6.79485e-06	0.000209704
AT4G17250	488.018	-1.09575	0.118583	-9.24032	2.45756e-20	3.85798e-18
AT1G25560	1916.79	-1.09415	0.119171	-9.18133	4.25811e-20	6.43136e-18	TEM1
AT1G06160	103.567	-1.0935	0.206631	-5.29202	1.20974e-07	4.89219e-06	ORA59
AT1G70700	2614.13	-1.09158	0.0929625	-11.7422	7.74844e-32	3.51092e-29	TIFY7
AT1G76600	244.756	-1.0908	0.177466	-6.14653	7.91946e-10	4.21041e-08
AT3G49530	738.188	-1.08766	0.110199	-9.86996	5.61852e-23	1.05676e-20	ANAC062
AT1G23870	1397.9	-1.08469	0.135179	-8.02413	1.02247e-15	1.02437e-13	ATTPS9
AT1G08930	2774.39	-1.07852	0.125982	-8.5609	1.11992e-17	1.34505e-15	ERD6
AT2G27830	1043.86	-1.07249	0.14701	-7.29533	2.97938e-13	2.29343e-11
AT5G03355	72.8561	-1.07003	0.256442	-4.17259	3.01152e-05	0.000802682
AT2G28780	74.2353	-1.06831	0.299512	-3.56684	0.000361314	0.00735053
AT1G22570	133.679	-1.06791	0.20885	-5.11328	3.16617e-07	1.20927e-05
AT1G21550	73.1531	-1.06663	0.240291	-4.4389	9.04202e-06	0.000271084
AT5G04340	279.565	-1.06524	0.140893	-7.56067	4.01009e-14	3.43129e-12	C2H2
AT3G48360	9698.61	-1.06417	0.0936776	-11.36	6.61699e-30	2.44302e-27	BT2
AT1G73805	62.4005	-1.06251	0.25187	-4.21847	2.45967e-05	0.000669924
AT5G14120	4644.42	-1.05916	0.146472	-7.23113	4.78998e-13	3.6311e-11
AT2G41640	208.32	-1.05522	0.160856	-6.56004	5.37941e-11	3.2207e-09
AT3G19430	84.444	-1.05405	0.324644	-3.24679	0.00116713	0.0198601
AT2G33830	1098.94	-1.05225	0.185495	-5.67266	1.40599e-08	6.54933e-07
AT1G75960	306.164	-1.05086	0.181678	-5.78417	7.2872e-09	3.54353e-07
AT5G43190	409.153	-1.0502	0.126361	-8.31108	9.48338e-17	1.05626e-14
AT3G10930	31.1241	-1.0484	0.340052	-3.08305	0.00204887	0.0317392
AT1G76590	153.844	-1.0438	0.181332	-5.7563	8.59785e-09	4.11068e-07
AT1G69890	432.173	-1.03815	0.127281	-8.15635	3.45308e-16	3.62337e-14
AT5G16370	681.604	-1.03593	0.121499	-8.52624	1.51187e-17	1.78355e-15	AAE5
AT5G52050	306.002	-1.03184	0.14669	-7.03413	2.00503e-12	1.41753e-10
AT4G36040	513.829	-1.03066	0.134368	-7.67042	1.71428e-14	1.519e-12
AT4G19420	934.467	-1.03041	0.112989	-9.11957	7.54206e-20	1.09756e-17
AT4G11660	253.528	-1.02984	0.148362	-6.9414	3.88235e-12	2.66905e-10	AT-HSFB2B
AT3G48390	60.2887	-1.02805	0.248405	-4.13861	3.49416e-05	0.00091182
AT5G49450	234.864	-1.02721	0.190336	-5.39685	6.78192e-08	2.85255e-06	AtbZIP1
AT2G15880	138.763	-1.0198	0.19033	-5.35803	8.41328e-08	3.46561e-06
AT3G56880	711.772	-1.0186	0.149836	-6.7981	1.06012e-11	7.02177e-10
AT5G54720	132.402	-1.01762	0.226897	-4.48496	7.29278e-06	0.000223343
AT3G28180	1293.3	-1.015	0.128909	-7.87377	3.44124e-15	3.28268e-13	ATCSLC04
AT3G51910	248.912	-1.01437	0.163536	-6.20272	5.5494e-10	2.99022e-08	AT-HSFA7A
AT1G19180	776.785	-1.01393	0.12149	-8.3458	7.0734e-17	8.01263e-15	TIFY10A
AT4G03510	346.057	-1.01101	0.139307	-7.25738	3.9465e-13	3.02621e-11	RMA1
AT5G26110	203.31	-1.00951	0.158253	-6.37911	1.78125e-10	1.00036e-08
AT5G43580	311.223	-1.00873	0.161949	-6.22869	4.70355e-10	2.54822e-08
AT1G63750	201.469	-1.00818	0.164905	-6.11368	9.73616e-10	5.1488e-08
AT2G39570	2687	-1.00623	0.104253	-9.65182	4.82928e-22	8.30011e-20
AT3G30775	2511.2	-1.00328	0.159738	-6.2808	3.36828e-10	1.86537e-08	ERD5
AT1G15670	242.123	-0.99511	0.161769	-6.15141	7.67953e-10	4.09376e-08
AT5G19870	36.6016	-0.993381	0.323224	-3.07336	0.00211665	0.0326371
AT4G01250	129.958	-0.990723	0.202424	-4.8943	9.86539e-07	3.51226e-05	WRKY22
AT3G50560	93.6944	-0.988881	0.208822	-4.73551	2.18506e-06	7.34401e-05
AT3G04210	589.154	-0.984042	0.134503	-7.31616	2.55172e-13	1.98725e-11
AT1G77210	339.179	-0.983889	0.130895	-7.51663	5.62066e-14	4.66913e-12	STP14
AT2G47440	737.568	-0.978183	0.126781	-7.71556	1.20454e-14	1.0769e-12
AT1G02390	58.0021	-0.978014	0.253851	-3.85272	0.000116814	0.00270491	ATGPAT2
AT1G30820	971.944	-0.977091	0.143507	-6.80868	9.84969e-12	6.54577e-10
AT3G30720	54.1352	-0.972854	0.265646	-3.66222	0.000250042	0.00530951	QQS
AT4G13395	45.8069	-0.965223	0.290313	-3.32477	0.000884924	0.0157665	DVL10
AT3G57530	1468.73	-0.964513	0.0976519	-9.87706	5.23473e-23	9.93951e-21	CPK32
AT1G30040	67.9175	-0.963535	0.236865	-4.06786	4.74467e-05	0.00119588	ATGA2OX2
AT2G46510	566.896	-0.962265	0.117079	-8.21895	2.053e-16	2.2245e-14	ATAIB
AT5G23130	140.726	-0.958569	0.180726	-5.30399	1.133e-07	4.5912e-06
AT5G54710	571.279	-0.958543	0.121106	-7.91493	2.47391e-15	2.37126e-13
AT1G14200	332.343	-0.958226	0.14793	-6.47754	9.32278e-11	5.49906e-09
AT3G50570	60.5097	-0.956556	0.256356	-3.73136	0.000190446	0.00421389
AT4G24380	173.157	-0.956452	0.167726	-5.70248	1.18078e-08	5.57849e-07
AT2G39400	324.551	-0.954628	0.141136	-6.76386	1.34361e-11	8.64116e-10
AT1G06520	44.6552	-0.949855	0.302304	-3.14205	0.00167769	0.0269525	ATGPAT1
AT1G19380	80.337	-0.949063	0.218938	-4.33485	1.45861e-05	0.000417222
AT2G17040	92.6753	-0.942681	0.227667	-4.14062	3.46376e-05	0.00090745	anac036
AT1G69840	602.708	-0.941158	0.118266	-7.95799	1.74853e-15	1.70051e-13
AT4G14680	1020.73	-0.939439	0.115884	-8.10674	5.19938e-16	5.3433e-14	APS3
AT5G17300	617.493	-0.939365	0.114728	-8.18776	2.6614e-16	2.82236e-14	RVE1
AT5G67480	2262.6	-0.936258	0.101679	-9.20798	3.32319e-20	5.09649e-18	BT4
AT5G47240	202.825	-0.935615	0.162821	-5.74629	9.12246e-09	4.34068e-07	atnudt8
AT5G05440	825.003	-0.933762	0.111239	-8.3942	4.69087e-17	5.37482e-15	PYL5
AT2G33580	99.9482	-0.927881	0.203482	-4.56001	5.11515e-06	0.00016221
AT3G29670	45.9719	-0.927764	0.295586	-3.13873	0.00169683	0.0271221
AT3G45640	2005.66	-0.926944	0.112743	-8.22172	2.00603e-16	2.18548e-14	ATMPK3
AT2G45050	104.213	-0.925589	0.211859	-4.36888	1.24884e-05	0.000362417	GATA2
AT1G08920	700.337	-0.925244	0.130479	-7.09115	1.33006e-12	9.60779e-11	ESL1
AT1G25550	2355.74	-0.91329	0.0921338	-9.91264	3.66816e-23	7.03194e-21
AT4G37240	98.3382	-0.912815	0.200772	-4.54652	5.45395e-06	0.000171237
AT5G59550	408.211	-0.911656	0.134265	-6.79	1.12136e-11	7.33001e-10
AT3G27700	452.446	-0.91096	0.163589	-5.5686	2.56796e-08	1.15309e-06
AT5G23980	248.661	-0.906122	0.233535	-3.88003	0.000104445	0.00244404	ATFRO4
AT2G36780	56.6408	-0.903135	0.28684	-3.14857	0.00164072	0.0264438
AT1G74950	818.786	-0.903092	0.110974	-8.13785	4.02343e-16	4.17787e-14	JAZ2
AT4G01950	792.558	-0.902984	0.138163	-6.53564	6.33368e-11	3.78068e-09	ATGPAT3
AT5G59820	203.658	-0.902362	0.171536	-5.26047	1.43686e-07	5.72932e-06	RHL41
AT5G66820	262.623	-0.90022	0.185483	-4.85339	1.2137e-06	4.24972e-05
AT5G54380	1337.75	-0.896432	0.140878	-6.3632	1.97597e-10	1.1066e-08	THE1
AT4G24230	648.56	-0.894717	0.117176	-7.63569	2.24607e-14	1.97268e-12	ACBP3
AT5G04760	89.6192	-0.889401	0.208302	-4.26976	1.95684e-05	0.000548713
AT5G24210	1702.53	-0.889066	0.110068	-8.07746	6.61311e-16	6.75606e-14
AT3G12150	339.436	-0.888183	0.136764	-6.49429	8.34254e-11	4.93547e-09
AT3G62720	313.517	-0.887254	0.150408	-5.89897	3.65783e-09	1.83693e-07	ATXT1
AT3G10985	1236.83	-0.886957	0.113452	-7.81788	5.3722e-15	5.00493e-13	SAG20
AT1G28260	248.776	-0.885566	0.156542	-5.65704	1.54005e-08	7.11351e-07
AT2G38820	144.98	-0.884605	0.186813	-4.73523	2.18806e-06	7.34401e-05
AT2G25090	89.3253	-0.882688	0.213263	-4.13896	3.48884e-05	0.000911626	CIPK16
AT1G56540	64.8567	-0.868606	0.259157	-3.35166	0.000803285	0.0145196
AT5G21170	446.84	-0.868371	0.127911	-6.78885	1.13027e-11	7.36413e-10	AKINBETA1
AT5G51390	76.0034	-0.866835	0.245473	-3.53129	0.000413544	0.00826963
AT3G45970	183.691	-0.865575	0.181129	-4.77879	1.76357e-06	6.03094e-05	ATEXLA1
AT3G12580	2450.13	-0.864725	0.126489	-6.83635	8.12356e-12	5.43488e-10	HSP70
AT2G46400	55.1409	-0.863453	0.272301	-3.17095	0.00151941	0.024769	WRKY46
AT4G13493	55.4238	-0.860603	0.263761	-3.26282	0.0011031	0.0189361	MIR850A
AT1G33960	146.102	-0.860062	0.206999	-4.15491	3.25417e-05	0.000860456	AIG1
AT1G68670	1051.15	-0.858901	0.104033	-8.25603	1.50595e-16	1.668e-14
AT4G19530	2511.14	-0.857031	0.153436	-5.58561	2.32884e-08	1.05523e-06
AT1G53440	499.841	-0.856388	0.187626	-4.56435	5.01048e-06	0.000159575
AT5G64120	625.123	-0.852768	0.162587	-5.245	1.5628e-07	6.19434e-06
AT4G19690	408.439	-0.850458	0.195571	-4.34858	1.37021e-05	0.000393631	IRT1
AT2G30600	724.596	-0.850416	0.188427	-4.51324	6.38434e-06	0.000198572
AT2G27310	272.031	-0.849918	0.14208	-5.98195	2.20479e-09	1.1271e-07
AT4G02075	173.002	-0.845975	0.18486	-4.5763	4.73275e-06	0.000150971	PIT1
AT1G15125	482.266	-0.845832	0.177699	-4.75992	1.93671e-06	6.55556e-05
AT5G11250	410.7	-0.844451	0.158725	-5.32022	1.03642e-07	4.22558e-06
AT1G10020	615.256	-0.843935	0.114102	-7.39632	1.40008e-13	1.11209e-11
AT2G32800	479.295	-0.841973	0.123897	-6.79574	1.07758e-11	7.11384e-10	AP4.3A
AT2G26860	100.46	-0.840858	0.206044	-4.08096	4.48494e-05	0.00113617
AT4G19160	2169.15	-0.839357	0.0959725	-8.7458	2.21435e-18	2.84823e-16
AT3G23100	126.854	-0.837439	0.213661	-3.91948	8.87408e-05	0.00210122	XRCC4
AT1G80920	1821.83	-0.836855	0.140383	-5.96124	2.50325e-09	1.27315e-07	J8
AT2G31880	525.25	-0.835463	0.142082	-5.88013	4.09939e-09	2.04324e-07	SOBIR1
AT5G07770	207.879	-0.833677	0.17821	-4.67806	2.89601e-06	9.55922e-05
AT1G24575	77.6187	-0.833399	0.239153	-3.48479	0.000492517	0.00958917
AT1G01580	181.469	-0.832157	0.226707	-3.67063	0.00024195	0.00517569	FRO2
AT3G22740	114.557	-0.832136	0.235951	-3.52673	0.000420718	0.00839342	HMT3
AT3G26510	815.295	-0.832044	0.115004	-7.23489	4.65893e-13	3.54523e-11
AT3G57450	453.124	-0.830974	0.120852	-6.87597	6.15702e-12	4.1895e-10
AT4G33300	1505.8	-0.830957	0.111323	-7.46436	8.37081e-14	6.81179e-12	ADR1-L1
AT3G54810	968.633	-0.827726	0.122863	-6.73698	1.61711e-11	1.0235e-09	BME3-ZF
AT4G12690	131.105	-0.824327	0.183082	-4.50249	6.71615e-06	0.000207597
AT1G27770	1726.94	-0.823658	0.151245	-5.44586	5.15547e-08	2.20568e-06	ACA1
AT4G16008	67.8272	-0.821602	0.243799	-3.37	0.000751678	0.0137362
AT5G28770	562.528	-0.819962	0.151511	-5.41191	6.23576e-08	2.63954e-06	BZO2H3
AT5G56870	1323.14	-0.813993	0.113861	-7.14903	8.73961e-13	6.40594e-11	BGAL4
AT5G45110	471.294	-0.812514	0.123607	-6.57337	4.91895e-11	2.97179e-09	NPR3
AT1G66100	305.991	-0.810146	0.216878	-3.7355	0.000187343	0.00416859
AT2G36490	770.813	-0.806277	0.134017	-6.01622	1.78536e-09	9.2251e-08	DML1
AT4G00970	147.479	-0.805648	0.180672	-4.45917	8.22783e-06	0.000250058	CRK41
AT5G37770	705.23	-0.80561	0.163781	-4.91882	8.70668e-07	3.13897e-05	TCH2
AT5G51550	1379.18	-0.803529	0.105517	-7.61519	2.63299e-14	2.30236e-12	EXL3
AT2G23320	773.897	-0.802831	0.110695	-7.25261	4.08807e-13	3.12275e-11	WRKY15
AT1G75020	332.224	-0.802046	0.135958	-5.89921	3.65252e-09	1.83693e-07	LPAT4
AT1G11380	264.242	-0.801898	0.147201	-5.44765	5.10405e-08	2.18838e-06
AT2G27500	726.884	-0.800291	0.11278	-7.09603	1.28391e-12	9.3081e-11
AT3G49570	620.791	-0.799191	0.160206	-4.98853	6.08397e-07	2.24622e-05	LSU3
AT5G05600	361.197	-0.798025	0.142043	-5.61821	1.92946e-08	8.82283e-07
AT5G47910	1954.32	-0.795508	0.128495	-6.19098	5.9791e-10	3.19586e-08	RBOHD
AT5G03720	86.5298	-0.794306	0.225208	-3.52699	0.000420305	0.00839342	AT-HSFA3
AT1G54740	623.735	-0.793767	0.114094	-6.95711	3.47323e-12	2.41274e-10
AT5G24590	557.947	-0.791867	0.113928	-6.9506	3.63726e-12	2.50921e-10	ANAC091
AT2G36050	88.287	-0.791534	0.248002	-3.19165	0.00141464	0.0233475	ATOFP15
AT3G17860	326.648	-0.790694	0.15584	-5.07374	3.90067e-07	1.47567e-05	JAZ3
AT1G03610	513.747	-0.790561	0.11895	-6.64617	3.00814e-11	1.86252e-09
AT4G38470	1690.09	-0.788376	0.109226	-7.21785	5.2815e-13	3.97348e-11
AT3G11820	676.02	-0.787551	0.111422	-7.0682	1.56954e-12	1.11757e-10	SYP121
AT5G50915	379.277	-0.785805	0.169427	-4.638	3.51791e-06	0.000114602
AT4G19520	943.335	-0.785358	0.141734	-5.54106	3.00652e-08	1.33202e-06
AT3G45730	68.16	-0.783265	0.241457	-3.24391	0.00117903	0.0200224
AT5G17510	353.975	-0.783158	0.132019	-5.93215	2.98992e-09	1.51295e-07
AT1G35710	268.566	-0.78224	0.176263	-4.43791	9.08362e-06	0.000271922
AT1G68190	404.214	-0.782222	0.130325	-6.00209	1.94798e-09	1.00095e-07
AT2G18670	113.452	-0.781536	0.189998	-4.1134	3.89872e-05	0.00100295
AT5G58430	1253.46	-0.777176	0.0998341	-7.78467	6.9893e-15	6.45119e-13	ATEXO70B1
AT4G01330	705.443	-0.774122	0.120895	-6.40324	1.5211e-10	8.71443e-09
AT4G12720	925.479	-0.773858	0.121012	-6.39489	1.60664e-10	9.12584e-09	NUDT7
AT4G17460	555.199	-0.76948	0.122797	-6.2663	3.69717e-10	2.02501e-08	HAT1
AT3G25600	257.692	-0.766967	0.174524	-4.39462	1.10967e-05	0.000326304
AT1G23020	857.657	-0.766179	0.172798	-4.43396	9.25187e-06	0.000276543	FRO3
AT4G26400	508.551	-0.760762	0.132864	-5.72589	1.02895e-08	4.88434e-07
AT1G28190	96.2289	-0.759616	0.21852	-3.47619	0.000508594	0.00983496
AT1G29720	211.963	-0.759536	0.159249	-4.76947	1.84707e-06	6.26275e-05
AT4G25835	206.888	-0.759294	0.157918	-4.80814	1.52344e-06	5.2548e-05
AT5G66210	700.874	-0.759062	0.112612	-6.74048	1.5786e-11	1.00551e-09	CPK28
AT1G23710	337.999	-0.756552	0.132204	-5.72263	1.0489e-08	4.96721e-07
AT1G44350	193.836	-0.75578	0.17454	-4.33013	1.49018e-05	0.000425032	ILL6
AT1G19770	1342.81	-0.753861	0.105104	-7.17251	7.3634e-13	5.4574e-11	ATPUP14
AT5G06320	715.15	-0.752571	0.109935	-6.8456	7.61564e-12	5.11222e-10	NHL3
AT1G74770	470.715	-0.745972	0.171682	-4.34508	1.39225e-05	0.000399384
AT3G62930	59.4472	-0.745044	0.252092	-2.95545	0.00312215	0.0442372
AT1G59590	210.453	-0.743689	0.16545	-4.49494	6.95904e-06	0.000214439	ZCF37
AT1G49780	387.631	-0.742943	0.127655	-5.81993	5.88719e-09	2.88386e-07	PUB26
AT4G10925	175.389	-0.740767	0.158601	-4.67064	3.00257e-06	9.89458e-05
AT3G09100	835.001	-0.740708	0.11117	-6.66286	2.68558e-11	1.67844e-09
AT2G37950	158.23	-0.735574	0.182027	-4.04101	5.32211e-05	0.00132908
AT4G30440	2689.54	-0.732317	0.0943497	-7.76173	8.3778e-15	7.60426e-13	GAE1
AT4G20820	571.834	-0.72548	0.1283	-5.65454	1.5626e-08	7.1948e-07
AT2G24240	101.33	-0.725123	0.224522	-3.22962	0.00123954	0.0209089
AT1G79700	105.059	-0.724938	0.21819	-3.32252	0.000892097	0.0158444
AT1G74310	512.97	-0.72488	0.146011	-4.96457	6.88518e-07	2.52799e-05	ATHSP101
AT3G05200	651.345	-0.72471	0.114669	-6.32002	2.61532e-10	1.46055e-08	ATL6
AT1G72416	175.779	-0.723534	0.161871	-4.46981	7.82892e-06	0.000238662
AT5G08520	508.662	-0.722864	0.147428	-4.90316	9.4308e-07	3.36957e-05
AT1G64230	3085.78	-0.722363	0.0956187	-7.55462	4.20081e-14	3.5639e-12	UBC28
AT1G05300	62.5806	-0.717969	0.241698	-2.97053	0.00297289	0.04261	ZIP5
AT4G37250	369.767	-0.713822	0.136383	-5.23396	1.65914e-07	6.56313e-06
AT5G52750	74.5771	-0.711926	0.234473	-3.03628	0.00239515	0.0361212
AT4G09460	218.842	-0.711044	0.157605	-4.51156	6.43519e-06	0.000199842	AtMYB6
AT4G21510	112.515	-0.70969	0.19647	-3.6122	0.000303611	0.00633608
AT3G02040	765.282	-0.706703	0.149162	-4.73781	2.16039e-06	7.27561e-05	SRG3
AT1G80960	78.6978	-0.705312	0.227417	-3.10141	0.00192604	0.0301408
AT4G18010	1272.33	-0.699859	0.108948	-6.42377	1.32942e-10	7.70486e-09	IP5PII
AT2G35930	209.368	-0.699655	0.163622	-4.27605	1.90241e-05	0.000534956	PUB23
AT3G52400	426.83	-0.699236	0.125441	-5.57424	2.48614e-08	1.12395e-06	SYP122
AT1G70090	1097.82	-0.698706	0.109528	-6.37927	1.77932e-10	1.00036e-08	GATL9
AT5G50450	378.936	-0.698648	0.153471	-4.55231	5.30599e-06	0.000167382
AT1G18300	97.023	-0.697268	0.222985	-3.12698	0.00176615	0.027968	atnudt4
AT2G29670	991.831	-0.696262	0.122812	-5.66931	1.43371e-08	6.6474e-07
AT4G18880	230.841	-0.695286	0.169295	-4.10694	4.00938e-05	0.00102436	AT-HSFA4A
AT3G47620	849.8	-0.689738	0.112897	-6.10943	9.99859e-10	5.2736e-08	AtTCP14
AT5G63160	5404.78	-0.687728	0.107525	-6.39596	1.59538e-10	9.08775e-09	BT1
AT3G15620	119.708	-0.687672	0.190761	-3.60489	0.000312284	0.00645852	UVR3
AT5G66480	103.953	-0.687671	0.205714	-3.34286	0.000829207	0.014907
AT5G48850	2030.94	-0.68764	0.121291	-5.66935	1.43342e-08	6.6474e-07	ATSDI1
AT4G02330	171.445	-0.685813	0.17137	-4.00194	6.28264e-05	0.00154638	ATPMEPCRB
AT4G25990	124.668	-0.684444	0.222	-3.08308	0.00204871	0.0317392	CIL
AT5G25210	196.246	-0.681745	0.162235	-4.20222	2.64312e-05	0.000715006
AT1G60140	1304.01	-0.681349	0.127224	-5.3555	8.53181e-08	3.50719e-06	ATTPS10
AT1G04770	1183.68	-0.678762	0.136565	-4.97025	6.68667e-07	2.46418e-05
AT3G06355	221.709	-0.678534	0.165692	-4.09516	4.21868e-05	0.0010728
AT2G18690	160.91	-0.677837	0.195503	-3.46715	0.000526005	0.0101323
AT4G23210	77.8406	-0.676126	0.225836	-2.99388	0.00275459	0.0404645	CRK13
AT3G10020	704.634	-0.674883	0.133692	-5.04805	4.46334e-07	1.67266e-05
AT4G15700	81.6603	-0.673607	0.229442	-2.93585	0.00332638	0.046539
AT3G10720	701.186	-0.673361	0.147554	-4.5635	5.03074e-06	0.000159965
AT4G25940	343.408	-0.673056	0.144718	-4.65082	3.3061e-06	0.000108055
AT3G07870	576.364	-0.671717	0.124718	-5.3859	7.20832e-08	3.01917e-06
AT1G27290	954.973	-0.671123	0.1258	-5.33483	9.56326e-08	3.91504e-06
AT5G05190	119.047	-0.670919	0.19617	-3.42009	0.000626013	0.0117966
AT2G23130	646.306	-0.670108	0.123862	-5.4101	6.29888e-08	2.65499e-06	AGP17
AT2G15080	365.83	-0.670075	0.155495	-4.3093	1.6377e-05	0.000465774	AtRLP19
AT5G10380	185.992	-0.669943	0.167587	-3.99758	6.39937e-05	0.00156545	RING1
AT2G30020	286.336	-0.669443	0.157776	-4.24299	2.20565e-05	0.000608215
AT5G60270	477.683	-0.669189	0.124586	-5.37129	7.81768e-08	3.24073e-06
AT5G39580	148.274	-0.66865	0.183951	-3.63493	0.000278056	0.00586005
AT5G46020	1582.56	-0.668409	0.142595	-4.68748	2.76594e-06	9.14503e-05
AT5G07990	678.473	-0.663122	0.198579	-3.33934	0.00083978	0.0150564	TT7
AT3G55510	266.636	-0.663102	0.156837	-4.22797	2.3581e-05	0.000644286	RBL
AT5G25250	129.173	-0.662902	0.218821	-3.02943	0.00245018	0.0367294
AT3G24000	118.148	-0.662896	0.197984	-3.34823	0.000813308	0.0146741
AT5G15870	381.956	-0.662259	0.171742	-3.85614	0.000115193	0.00267047
AT4G13495	1699.53	-0.660891	0.10572	-6.25136	4.06901e-10	2.22257e-08
AT5G08790	1237.14	-0.659371	0.101892	-6.47126	9.71904e-11	5.71589e-09	ATAF2
AT1G14370	172.726	-0.658928	0.167811	-3.9266	8.61547e-05	0.00204972	APK2A
AT1G27100	1239	-0.657785	0.104773	-6.27821	3.42487e-10	1.88623e-08
AT2G32150	688.553	-0.654428	0.118593	-5.51828	3.42333e-08	1.50998e-06
AT3G26240	325.768	-0.652661	0.170963	-3.81755	0.000134781	0.00309221
AT5G59080	209.235	-0.64931	0.157899	-4.11219	3.91922e-05	0.00100693
AT3G18320	114.877	-0.647755	0.189221	-3.42327	0.00061872	0.0116813
AT2G04630	490.144	-0.646047	0.153773	-4.20131	2.65375e-05	0.000716908	NRPB6B
AT1G15890	105.769	-0.644639	0.197419	-3.26533	0.00109335	0.0188077
AT1G33560	542.026	-0.644355	0.132506	-4.86285	1.15708e-06	4.06857e-05	ADR1
AT4G15760	2344.13	-0.643106	0.109833	-5.85531	4.76108e-09	2.36123e-07	MO1
AT2G01850	2385.17	-0.642962	0.0967598	-6.64493	3.03367e-11	1.87252e-09	EXGT-A3
AT3G22060	386.277	-0.641903	0.129709	-4.94881	7.46702e-07	2.73156e-05
AT4G19860	1615.1	-0.639265	0.108428	-5.89578	3.72909e-09	1.86801e-07
AT1G68580	924.945	-0.639191	0.109173	-5.85486	4.77414e-09	2.36184e-07
AT4G33050	715.339	-0.638584	0.121269	-5.26585	1.39544e-07	5.57531e-06	EDA39
AT2G43900	536.175	-0.638303	0.165477	-3.85735	0.000114622	0.00266342
AT3G58120	483.227	-0.636125	0.127155	-5.00276	5.65141e-07	2.09428e-05	ATBZIP61
AT3G14200	528.727	-0.635936	0.115538	-5.50414	3.70971e-08	1.62551e-06
AT2G41410	1814.48	-0.635788	0.0948761	-6.70125	2.06648e-11	1.30378e-09
AT3G59080	310.157	-0.635351	0.157674	-4.02953	5.58873e-05	0.00138931
AT5G55970	333.272	-0.63433	0.142693	-4.44541	8.77231e-06	0.000263791
AT4G39070	130.195	-0.632417	0.1828	-3.4596	0.00054097	0.0103533
AT3G25760	1060.81	-0.628332	0.113025	-5.55924	2.70956e-08	1.20581e-06	AOC1
AT4G36670	247.731	-0.627758	0.174852	-3.59023	0.000330387	0.00676276
AT3G50930	151.028	-0.626153	0.191914	-3.26267	0.00110367	0.0189361	BCS1
AT1G66160	96.15	-0.626146	0.208119	-3.00859	0.0026246	0.0389335	ATCMPG1
AT4G29190	292.941	-0.622249	0.151162	-4.11643	3.84788e-05	0.000992435
AT5G58120	716.263	-0.620982	0.152762	-4.06503	4.80268e-05	0.00120745
AT3G49580	531.997	-0.618771	0.172339	-3.59043	0.000330127	0.00676276	LSU1
AT1G29690	436.633	-0.617901	0.122598	-5.04008	4.65344e-07	1.74063e-05	CAD1
AT2G39200	160.149	-0.616456	0.199476	-3.09038	0.00199899	0.0311359	MLO12
AT4G29310	275.175	-0.614633	0.146101	-4.20692	2.58877e-05	0.000702209
AT5G08330	342.456	-0.614338	0.138093	-4.44873	8.6379e-06	0.000260535
AT4G14365	146.249	-0.611782	0.181776	-3.36559	0.000763806	0.0139196	XBAT34
AT2G36080	174.602	-0.607075	0.170517	-3.56019	0.000370583	0.00750845
AT4G28300	1270.83	-0.605774	0.137565	-4.40355	1.06496e-05	0.000314548
AT3G62420	1362.4	-0.60533	0.12827	-4.71919	2.36789e-06	7.92092e-05	ATBZIP53
AT1G22330	190.774	-0.604749	0.154218	-3.92139	8.80403e-05	0.00208711
AT1G70520	497.259	-0.604719	0.11722	-5.15886	2.48464e-07	9.65618e-06	CRK2
AT1G67050	147.643	-0.604606	0.181368	-3.33359	0.000857331	0.0153297
AT1G73540	288.364	-0.602446	0.155185	-3.88212	0.000103551	0.00242597	atnudt21
AT1G59620	378.334	-0.601185	0.128973	-4.66132	3.14193e-06	0.000103197	CW9
AT4G30110	146.591	-0.601124	0.173758	-3.45954	0.0005411	0.0103533	HMA2
AT2G45170	667	-0.600385	0.132412	-4.53422	5.78171e-06	0.000180958	ATATG8E
AT1G72560	464.221	-0.59937	0.176529	-3.39531	0.000685521	0.0127137	PSD
AT4G12400	271.307	-0.598737	0.142989	-4.18728	2.82318e-05	0.000756528	Hop3
AT3G18290	4412.31	-0.596105	0.157459	-3.78577	0.000153231	0.0034755	EMB2454
AT1G33240	1934.62	-0.595568	0.127947	-4.65482	3.24267e-06	0.000106156	AT-GTL1
AT3G01290	1308.81	-0.593951	0.11039	-5.38048	7.4287e-08	3.10495e-06
AT1G22370	249.222	-0.591391	0.162347	-3.64275	0.000269736	0.00570278	AtUGT85A5
AT3G53540	713.389	-0.591099	0.138613	-4.26439	2.00451e-05	0.000559718
AT4G30270	2343.69	-0.588523	0.139773	-4.21056	2.54743e-05	0.000691936	MERI5B
AT1G78310	150.914	-0.58843	0.180116	-3.26694	0.00108715	0.0187634
AT5G47070	193.945	-0.587934	0.160542	-3.66219	0.000250069	0.00530951
AT4G04610	5412.47	-0.586964	0.091433	-6.41961	1.36621e-10	7.87228e-09	APR1
AT3G23510	178.585	-0.585701	0.163691	-3.57809	0.000346108	0.0070628
AT1G61890	744.304	-0.585028	0.108493	-5.39229	6.95661e-08	2.91987e-06
AT5G02290	621.365	-0.579152	0.117044	-4.94817	7.49136e-07	2.73545e-05	NAK
AT1G07150	104.411	-0.577423	0.192753	-2.99566	0.0027385	0.0402934	MAPKKK13
AT1G72430	1459.93	-0.576698	0.100056	-5.76375	8.22673e-09	3.9427e-07
AT3G32940	318.544	-0.57463	0.154031	-3.73061	0.000191016	0.00421736
AT2G15890	3005.43	-0.573873	0.142817	-4.01825	5.86324e-05	0.00144672	MEE14
AT3G02140	187.372	-0.573797	0.15964	-3.59432	0.00032524	0.00667796	TMAC2
AT3G45140	31580.1	-0.573485	0.108825	-5.26977	1.36596e-07	5.46851e-06	LOX2
AT4G17230	463.024	-0.573398	0.135155	-4.24253	2.21011e-05	0.000608603	SCL13
AT5G46780	244.604	-0.573096	0.156343	-3.66564	0.000246722	0.00524962
AT4G23570	830.345	-0.572351	0.109673	-5.21872	1.80167e-07	7.09878e-06	SGT1A
AT5G03470	396.43	-0.572227	0.134037	-4.26916	1.96212e-05	0.000549422	ATB' ALPHA
AT5G19240	1086.17	-0.572006	0.134761	-4.2446	2.18981e-05	0.000604685
AT4G34138	1226.49	-0.571982	0.146367	-3.90787	9.31146e-05	0.00219695	UGT73B1
AT3G06380	667.137	-0.571394	0.114079	-5.00877	5.4778e-07	2.03372e-05	ATTLP9
AT5G45250	532.289	-0.57098	0.138415	-4.12512	3.70545e-05	0.000960671	RPS4
AT3G50950	1436.23	-0.57083	0.111164	-5.13504	2.82086e-07	1.0878e-05	ZAR1
AT2G23770	152.112	-0.570497	0.187463	-3.04324	0.00234043	0.0355108
AT4G29950	1557.43	-0.570419	0.104586	-5.45407	4.9231e-08	2.1245e-06
AT1G80610	205.356	-0.570012	0.152015	-3.74972	0.000177033	0.00396574
AT5G11070	1209.98	-0.569101	0.109153	-5.21381	1.85002e-07	7.25646e-06
AT1G22190	952.556	-0.569083	0.136896	-4.15705	3.22379e-05	0.000853555
AT3G08760	589.905	-0.56887	0.112187	-5.07071	3.96336e-07	1.49372e-05	ATSIK
AT5G10150	518.105	-0.567753	0.130037	-4.3661	1.26487e-05	0.000366536
AT1G61100	1413.83	-0.566148	0.105261	-5.37852	7.50986e-08	3.12576e-06
AT5G54170	1390.47	-0.565904	0.100038	-5.65689	1.54137e-08	7.11351e-07
AT3G09020	157.896	-0.565537	0.17115	-3.30434	0.000951989	0.0167518
AT1G23880	142.183	-0.563243	0.189594	-2.97079	0.00297032	0.0426038
AT1G71020	569.959	-0.562953	0.114243	-4.92769	8.32072e-07	3.01619e-05
AT4G11650	325.451	-0.562514	0.135876	-4.13991	3.47447e-05	0.000909061	ATOSM34
AT2G25640	224.629	-0.562439	0.166751	-3.37293	0.00074374	0.0136286
AT1G22400	561.254	-0.561333	0.122206	-4.59333	4.36227e-06	0.000140049	UGT85A1
AT2G44500	658.413	-0.557944	0.124871	-4.46817	7.88902e-06	0.000240127
AT2G48010	153.336	-0.557493	0.167987	-3.31867	0.000904474	0.0160147	RKF3
AT5G02010	222.685	-0.554999	0.159902	-3.47087	0.000518782	0.0100125	ATROPGEF7
AT5G52250	146.173	-0.553811	0.183783	-3.0134	0.00258336	0.0383502	RUP1
AT3G62860	341.329	-0.55291	0.135638	-4.07637	4.57434e-05	0.00115734
AT5G42650	6328.63	-0.552592	0.11958	-4.62111	3.81701e-06	0.000123338	AOS
AT2G24190	141.482	-0.552213	0.184571	-2.99187	0.00277277	0.0406178
AT2G01450	2022.71	-0.547024	0.0948668	-5.76623	8.1063e-09	3.89435e-07	ATMPK17
AT5G59450	218.823	-0.546692	0.163603	-3.34159	0.000833014	0.0149485
AT1G23480	574.618	-0.54643	0.132603	-4.12081	3.77548e-05	0.000975023	ATCSLA03
AT5G04770	169.564	-0.545757	0.185447	-2.94293	0.00325124	0.0458415	ATCAT6
AT2G46330	1194.68	-0.545019	0.117641	-4.63292	3.60551e-06	0.000117264	AGP16
AT2G17550	380.392	-0.544639	0.134784	-4.04082	5.32645e-05	0.00132908
AT2G44230	963.271	-0.543868	0.108171	-5.02785	4.9601e-07	1.8484e-05
AT1G78820	846.302	-0.543206	0.152962	-3.55124	0.000383418	0.00773705
AT5G65660	1450.85	-0.542647	0.113246	-4.79173	1.65345e-06	5.67383e-05
AT1G75230	236.554	-0.541924	0.143271	-3.78251	0.000155256	0.00351343
AT5G01810	1212.78	-0.541539	0.100821	-5.37127	7.81858e-08	3.24073e-06	CIPK15
AT4G17080	576.843	-0.540959	0.145855	-3.70887	0.000208182	0.00453114
AT2G15090	1207.83	-0.540466	0.110386	-4.89613	9.77432e-07	3.48606e-05	KCS8
AT5G15330	134.656	-0.539387	0.176475	-3.05646	0.00223968	0.0341641	ATSPX4
AT1G31540	612.405	-0.538149	0.129546	-4.15412	3.26545e-05	0.000862296
AT1G03090	586.994	-0.537799	0.134179	-4.00807	6.12161e-05	0.00150861	MCCA
AT5G65110	1532.1	-0.534756	0.14515	-3.68416	0.000229455	0.00493489	ACX2
AT1G01770	426.899	-0.533809	0.170264	-3.13518	0.00171749	0.0273933
AT5G16110	1724.83	-0.53317	0.108484	-4.91474	8.88991e-07	3.19348e-05
AT1G63420	278.602	-0.531501	0.159397	-3.33445	0.000854669	0.0152958
AT5G53130	1047.02	-0.531215	0.137131	-3.87379	0.000107156	0.0025016	CNGC1
AT3G52480	135.73	-0.531195	0.180783	-2.9383	0.00330013	0.0463343
AT2G26710	206.776	-0.530906	0.171376	-3.0979	0.00194895	0.0304755	BAS1
AT3G10010	416.773	-0.528151	0.171269	-3.08376	0.00204402	0.0317241	DML2
AT3G15760	173.225	-0.526897	0.180713	-2.91565	0.00354945	0.0489726
AT1G80630	218.269	-0.526378	0.151848	-3.46648	0.000527316	0.0101478
AT5G60680	1372.32	-0.523445	0.133911	-3.9089	9.27177e-05	0.00219018
AT4G02200	142.389	-0.5229	0.174717	-2.99284	0.00276394	0.0405182
AT4G03400	915.196	-0.521972	0.106179	-4.91597	8.8344e-07	3.17927e-05	DFL2
AT1G09070	1999.31	-0.521524	0.0976488	-5.34081	9.25323e-08	3.79592e-06	SRC2
AT1G02640	250.808	-0.520185	0.166854	-3.1176	0.0018233	0.0287134	BXL2
AT1G12240	3371.23	-0.520056	0.0915961	-5.6777	1.36514e-08	6.38893e-07	ATBETAFRUCT4
AT5G05730	668.362	-0.518988	0.132281	-3.92338	8.73148e-05	0.00207237	ASA1
AT4G17900	847.969	-0.518884	0.122206	-4.24598	2.17642e-05	0.000601821
AT5G57710	2624.17	-0.514548	0.113152	-4.54739	5.43154e-06	0.000170802
AT1G32700	769.629	-0.514485	0.11556	-4.4521	8.50347e-06	0.000256869
AT3G18980	408.407	-0.51437	0.12865	-3.99822	6.38193e-05	0.0015631	ETP1
AT3G49810	338.55	-0.513813	0.133082	-3.86087	0.000112986	0.00263462
AT3G17510	2292.2	-0.513803	0.100096	-5.13312	2.84973e-07	1.09682e-05	CIPK1
AT2G13540	884.635	-0.511784	0.116815	-4.38114	1.18058e-05	0.000345627	ENS
AT1G11260	1269.6	-0.511046	0.103307	-4.94688	7.54108e-07	2.74856e-05	STP1
AT1G68520	6127.49	-0.510427	0.0959779	-5.31818	1.04812e-07	4.26456e-06
AT3G23560	430.239	-0.510399	0.157432	-3.24203	0.00118684	0.0201378	ALF5
AT5G57630	699.664	-0.51037	0.11147	-4.57855	4.68199e-06	0.000149591	CIPK21
AT1G78450	289.091	-0.507562	0.141733	-3.58112	0.000342122	0.00698861
AT5G04040	797.859	-0.506025	0.112892	-4.48239	7.38127e-06	0.000225706	SDP1
AT5G10950	335.783	-0.50307	0.155477	-3.23566	0.00121363	0.0205513
AT4G33940	322.529	-0.502394	0.141873	-3.54116	0.000398375	0.00801452
AT2G20180	248.849	-0.500695	0.167044	-2.99738	0.00272309	0.0401555	PIL5
AT1G18460	718.262	-0.500624	0.157607	-3.17641	0.00149108	0.024427
AT1G15260	883.116	0.500845	0.114921	4.35815	1.31164e-05	0.000378987
AT3G30180	367.728	0.501225	0.127935	3.9178	8.93603e-05	0.00211338	CYP85A2
AT5G53420	719.522	0.502835	0.12371	4.06463	4.81091e-05	0.00120752
AT3G14450	150.541	0.50367	0.169819	2.96593	0.00301768	0.0431279	CID9
AT2G39220	254.186	0.503677	0.139523	3.61	0.000306195	0.00635898	PLP6
AT2G41940	443.689	0.50495	0.124962	4.04084	5.32606e-05	0.00132908	ZFP8
AT2G43340	485.692	0.507381	0.140514	3.61089	0.000305153	0.0063572
AT1G68185	177.027	0.510015	0.173259	2.94366	0.00324354	0.0457654
AT3G27350	706.995	0.511189	0.12189	4.19386	2.74251e-05	0.000737886
AT5G61570	183.703	0.511642	0.162557	3.14746	0.00164694	0.0265227
AT5G07000	150.433	0.514848	0.173769	2.96282	0.0030483	0.0434575	ATST2B
AT1G78070	798.091	0.515026	0.123017	4.18662	2.83144e-05	0.000757724
AT1G49560	177.146	0.516802	0.165207	3.12821	0.00175876	0.0279091
AT4G36640	819.869	0.516848	0.114327	4.5208	6.16066e-06	0.000192035
AT1G21560	399.141	0.519078	0.14594	3.5568	0.000375401	0.00759063
AT2G44940	336.894	0.521548	0.154388	3.37815	0.000729742	0.0134339
AT3G23210	224.854	0.521967	0.151328	3.44925	0.00056215	0.0106943	bHLH34
AT4G34560	238.101	0.522649	0.160738	3.25157	0.00114771	0.019574
AT1G13460	419.467	0.522663	0.13125	3.98218	6.82851e-05	0.00165313
AT3G29030	546.188	0.523571	0.140326	3.7311	0.000190647	0.00421389	ATEXPA5
AT3G61550	311.938	0.525916	0.142106	3.70086	0.000214866	0.00466136
AT1G19050	178.092	0.527857	0.161743	3.26356	0.00110022	0.0189096	ARR7
AT1G54575	263.447	0.530701	0.172008	3.08532	0.00203333	0.0315966
AT1G20160	255.371	0.530721	0.157311	3.3737	0.000741649	0.0136028	ATSBT5.2
AT2G15050	1273.7	0.531909	0.127194	4.18189	2.89097e-05	0.000772617	LTP
AT1G51060	1551.86	0.531935	0.122757	4.33324	1.46929e-05	0.000419674	HTA10
AT5G61810	563.635	0.534838	0.12075	4.42932	9.45321e-06	0.000282139
AT1G75390	206.942	0.536174	0.151648	3.53564	0.000406785	0.00816725	AtbZIP44
AT5G41400	221.134	0.537561	0.148434	3.62154	0.000292857	0.00614598
AT1G43910	293.457	0.538768	0.135309	3.98176	6.84073e-05	0.00165313
AT1G04000	209.034	0.540439	0.176287	3.06568	0.00217175	0.0333062
AT5G51720	1459.54	0.541272	0.150333	3.60048	0.000317633	0.00654199
AT4G34630	972.197	0.542372	0.132784	4.08463	4.4147e-05	0.00111979
AT1G17100	6862.35	0.54506	0.0978237	5.57187	2.52026e-08	1.13423e-06
AT1G76240	141.996	0.547218	0.183785	2.97748	0.00290624	0.0420782
AT1G74300	143.982	0.54892	0.181986	3.01627	0.00255903	0.0381309
AT5G15950	1254.86	0.550474	0.104066	5.28965	1.22551e-07	4.93595e-06
AT3G52740	339.385	0.552824	0.150779	3.66645	0.000245939	0.00524415
AT3G49110	294.758	0.554843	0.183193	3.02873	0.0024558	0.0367854	PRX33
AT1G68780	473.671	0.556352	0.13124	4.2392	2.24318e-05	0.00061686
AT1G26945	156.973	0.557865	0.180111	3.09734	0.00195268	0.0305099	KDR
AT3G08730	1939.98	0.5633	0.101083	5.57266	2.50882e-08	1.13164e-06	ATPK1
AT3G21700	187.019	0.563346	0.176962	3.18343	0.00145539	0.0239407	ATSGP2
AT2G47490	640.472	0.563483	0.125399	4.4935	7.00605e-06	0.000215555	ATNDT1
AT4G15550	1685.8	0.564285	0.126898	4.44678	8.7169e-06	0.000262521	IAGLU
AT3G21670	3288.95	0.565632	0.105151	5.37925	7.47984e-08	3.11978e-06
AT1G56430	582.648	0.565858	0.140319	4.03264	5.5154e-05	0.00137279	ATNAS4
AT1G64780	2744.09	0.566817	0.128069	4.42589	9.60456e-06	0.0002858	ATAMT1;2
AT3G49730	106.623	0.567089	0.192982	2.93856	0.00329745	0.0463343
AT5G43380	112.072	0.568991	0.187658	3.03207	0.00242886	0.0365235	TOPP6
AT3G24820	139.232	0.570103	0.191534	2.97651	0.00291553	0.042149
AT1G45010	340.905	0.571334	0.15033	3.80052	0.000144391	0.00329751
AT5G12050	155.754	0.572021	0.173925	3.28889	0.00100584	0.0175446
AT3G60530	974.892	0.57236	0.123869	4.62068	3.82489e-06	0.000123393	GATA4
AT5G05960	774.233	0.572948	0.135953	4.21432	2.50534e-05	0.000681432
AT4G02890	3597.7	0.57358	0.0955989	5.99986	1.97489e-09	1.01217e-07	UBQ14
AT4G32270	261.054	0.575552	0.162371	3.54468	0.000393093	0.00791626
AT5G60890	1025.7	0.579211	0.12344	4.69224	2.70231e-06	8.97933e-05	ATMYB34
AT3G04030	143.065	0.579881	0.171046	3.3902	0.000698415	0.0129048
AT5G51260	145.878	0.583051	0.183831	3.17166	0.00151569	0.0247468
AT3G57010	886.162	0.586433	0.118038	4.96817	6.75865e-07	2.48611e-05
AT5G17860	510.137	0.586561	0.157059	3.73466	0.000187972	0.00417792	CAX7
AT1G62290	799.89	0.587035	0.112784	5.20497	1.94026e-07	7.58488e-06
AT2G44670	1483.86	0.587722	0.110192	5.33361	9.62806e-08	3.93349e-06
AT5G59350	438.075	0.588184	0.134276	4.3804	1.18461e-05	0.000345793
AT1G57610	428.178	0.588305	0.128341	4.58391	4.5636e-06	0.000146277
AT2G39710	303.169	0.58845	0.140395	4.1914	2.77244e-05	0.000744935
AT5G47060	294.156	0.589513	0.13782	4.27741	1.89082e-05	0.000532449
AT3G48100	177.493	0.591128	0.169087	3.496	0.000472297	0.00929534	ARR5
AT5G07322	209.264	0.59264	0.184774	3.20738	0.00133952	0.0222645
AT1G47750	210.028	0.593271	0.161122	3.68212	0.0002313	0.00496385	PEX11A
AT4G30960	4657.37	0.595552	0.101216	5.884	4.00464e-09	2.00101e-07	CIPK6
AT2G38540	12961.2	0.5963	0.1225	4.86774	1.12882e-06	3.98951e-05	LP1
AT5G53990	111.226	0.599842	0.190484	3.14904	0.0016381	0.0264438
AT5G20790	630.727	0.600462	0.180745	3.32215	0.000893269	0.0158444
AT1G05170	342.175	0.604747	0.1366	4.42713	9.54955e-06	0.000284588
AT3G46130	432.431	0.610935	0.160071	3.81664	0.000135281	0.00310012	MYB48
AT5G16990	580.915	0.614534	0.133024	4.61974	3.84228e-06	0.000123754
AT4G39330	5558.61	0.620764	0.10173	6.10206	1.04709e-09	5.50815e-08	ATCAD9
AT1G24580	119.35	0.623837	0.20753	3.00601	0.00264701	0.0392077
AT1G58590	166.598	0.624624	0.210065	2.97348	0.00294448	0.0424163
AT5G49480	4057.51	0.626654	0.116696	5.36998	7.87435e-08	3.25707e-06	ATCP1
AT4G38320	116.263	0.629721	0.20761	3.03318	0.00241988	0.0364389	HHP5
AT4G09180	466.88	0.630749	0.140846	4.47828	7.52458e-06	0.000229736
AT1G13420	298.833	0.632563	0.193128	3.27535	0.00105532	0.0182638	ATST4B
AT2G15830	154.114	0.63577	0.217253	2.9264	0.00342905	0.0476743
AT1G03820	397.084	0.63642	0.139758	4.55372	5.27054e-06	0.000166527
AT1G09240	241.413	0.638245	0.162466	3.92848	8.54849e-05	0.00203622	NAS3
AT5G47330	117.789	0.639108	0.191239	3.34193	0.000831986	0.0149435
AT5G46690	286.337	0.640467	0.144787	4.42352	9.71049e-06	0.000288522	bHLH071
AT3G60300	1381.15	0.640913	0.131411	4.87715	1.0763e-06	3.8114e-05
AT1G65450	137.953	0.64241	0.191051	3.36251	0.000772365	0.0140371
AT5G06270	352.747	0.642763	0.15535	4.13752	3.51075e-05	0.000913757
AT1G15100	535.904	0.647163	0.145225	4.45629	8.33909e-06	0.000253054	RHA2A
AT1G01600	294.515	0.648106	0.173163	3.74276	0.000182011	0.00407267	CYP86A4
AT4G30400	285.233	0.651435	0.157052	4.14789	3.35551e-05	0.000882571
AT5G47500	1626.38	0.651546	0.149092	4.3701	1.24189e-05	0.000360926
AT2G12462	391.67	0.65456	0.148182	4.41727	9.99542e-06	0.000296546
AT4G12320	3947.71	0.655019	0.0996963	6.57015	5.02659e-11	3.02765e-09	CYP706A6
AT3G26612	89.423	0.657893	0.21065	3.12315	0.00178925	0.0282664
AT5G38050	72.9811	0.66067	0.226575	2.9159	0.0035466	0.0489671
AT1G17090	200.868	0.660878	0.201443	3.28072	0.00103544	0.0180229
AT2G38995	146.378	0.662305	0.194763	3.40057	0.000672446	0.0125295
AT3G29575	273.434	0.662819	0.184471	3.59308	0.000326795	0.00670299	AFP3
AT1G55920	1043.38	0.663434	0.116641	5.68785	1.28648e-08	6.0492e-07	ATSERAT2;1
AT4G09890	450.882	0.665476	0.157731	4.21905	2.4533e-05	0.000669102
AT5G25610	6428.04	0.668304	0.104429	6.39959	1.558e-10	8.90022e-09	RD22
AT3G55110	151.829	0.672352	0.186075	3.61334	0.000302282	0.00632381
AT3G20810	2068.13	0.673896	0.122629	5.49539	3.89859e-08	1.70452e-06	JMJD5
AT1G27940	180.264	0.674179	0.214107	3.14879	0.00163948	0.0264438	PGP13
AT2G46870	326.59	0.675145	0.164399	4.10674	4.01276e-05	0.00102436	NGA1
AT1G79410	953.931	0.677886	0.137697	4.92304	8.52111e-07	3.08322e-05	AtOCT5
AT2G29090	300.901	0.682395	0.160241	4.25855	2.0576e-05	0.00057214	CYP707A2
AT5G17450	119.481	0.682703	0.202218	3.37608	0.00073526	0.0135105	HIPP21
AT3G14210	9059.49	0.684317	0.102993	6.64433	3.04592e-11	1.87428e-09	ESM1
AT3G25590	171.872	0.686183	0.161126	4.25867	2.05642e-05	0.00057214
AT2G37300	130.889	0.692878	0.2058	3.36676	0.000760571	0.0138733
AT4G01080	976.253	0.69429	0.124168	5.59155	2.25053e-08	1.02207e-06	TBL26
AT2G42530	296.643	0.698347	0.222967	3.13206	0.00173585	0.0276198	COR15B
AT2G02120	237.818	0.702135	0.167948	4.18067	2.90653e-05	0.000775736	PDF2.1
AT2G40670	73.4326	0.702549	0.238972	2.93988	0.00328343	0.0462627	RR16
AT3G59310	293.555	0.704895	0.135174	5.21473	1.84083e-07	7.23879e-06
AT3G45070	489.16	0.707724	0.147354	4.80287	1.56405e-06	5.37627e-05
AT1G08847	72.1047	0.710237	0.232185	3.05893	0.0022213	0.0339617
AT4G35720	65.9023	0.711133	0.238909	2.97659	0.00291477	0.042149
AT3G60310	207.586	0.712825	0.152018	4.68908	2.74436e-06	9.08876e-05
AT1G29510	97.2868	0.71302	0.235365	3.02942	0.00245022	0.0367294	SAUR68
AT3G15650	156.331	0.714903	0.188614	3.79029	0.000150472	0.00342007
AT4G37800	5444.3	0.715383	0.111034	6.44289	1.17218e-10	6.81337e-09	XTH7
AT4G33550	188.735	0.715551	0.202584	3.53213	0.000412232	0.00825996
AT1G17180	507.307	0.715689	0.147098	4.8654	1.14226e-06	4.02353e-05	ATGSTU25
AT1G79110	769.795	0.717097	0.119195	6.01616	1.78607e-09	9.2251e-08
AT3G10570	181.573	0.719133	0.17009	4.22796	2.35818e-05	0.000644286	CYP77A6
AT4G00380	118.83	0.719416	0.192926	3.72897	0.000192267	0.00424016
AT3G15400	69.2283	0.721499	0.233975	3.08366	0.00204471	0.0317241	ATA20
AT3G60200	266.24	0.726207	0.163088	4.45285	8.4739e-06	0.000256364
AT3G28270	1758.75	0.726633	0.115414	6.29589	3.05642e-10	1.69738e-08
AT3G61280	69.9322	0.729612	0.247792	2.94445	0.00323526	0.0456809
AT2G19650	297.277	0.737897	0.156715	4.70852	2.49525e-06	8.31901e-05
AT3G61260	2750.99	0.738226	0.131201	5.62666	1.83729e-08	8.42072e-07
AT1G11600	280.567	0.742519	0.18009	4.12305	3.73882e-05	0.000968063	CYP77B1
AT1G20190	525.336	0.748135	0.1301	5.75046	8.90002e-09	4.24497e-07	ATEXPA11
AT3G20630	1515.5	0.756423	0.135952	5.56389	2.63819e-08	1.18197e-06	UBP14
AT4G10310	75.3363	0.761423	0.229363	3.31972	0.000901067	0.0159685	HKT1
AT3G14560	111.1	0.764208	0.196639	3.88635	0.000101762	0.00238685
AT2G43590	2460.06	0.770566	0.0964501	7.98928	1.35733e-15	1.33966e-13
AT3G20910	197.534	0.770713	0.155448	4.95803	7.12131e-07	2.60988e-05	NF-YA9
AT3G20540	1032.33	0.771581	0.119298	6.46767	9.95255e-11	5.836e-09	POLGAMMA1
AT3G20680	723.269	0.77253	0.126163	6.12326	9.16792e-10	4.86119e-08
AT5G42760	473.125	0.777874	0.121142	6.42117	1.35232e-10	7.81485e-09
AT5G48480	576.566	0.77789	0.152071	5.1153	3.13242e-07	1.19868e-05
AT3G26170	80.0028	0.778435	0.241759	3.21989	0.00128241	0.0214491	CYP71B19
AT4G24340	104.117	0.77949	0.21502	3.62519	0.000288744	0.00606605
AT3G05600	298.908	0.782296	0.188691	4.14592	3.38447e-05	0.000889014
AT2G41480	106.689	0.784036	0.197547	3.96886	7.22163e-05	0.00173467
AT5G41900	183.503	0.789854	0.161729	4.88382	1.04052e-06	3.69124e-05
AT3G59890	203.619	0.790474	0.173787	4.54852	5.4025e-06	0.000170158
AT3G61150	996.145	0.790819	0.105384	7.50415	6.18289e-14	5.11486e-12	HDG1
AT1G35290	53.7935	0.791345	0.270386	2.92673	0.00342549	0.0476581
AT3G60410	651.864	0.792691	0.117264	6.75991	1.38077e-11	8.85156e-10
AT5G20190	871.788	0.793944	0.113148	7.01686	2.26906e-12	1.59853e-10
AT3G44450	512.598	0.796315	0.150541	5.28971	1.22514e-07	4.93595e-06
AT3G60350	948.217	0.796531	0.156733	5.08208	3.73323e-07	1.4177e-05	ARABIDILLO-2
AT3G61190	71.2016	0.800558	0.251552	3.18247	0.00146024	0.0239888	BAP1
AT3G59300	1696.6	0.807405	0.112601	7.17047	7.47415e-13	5.51897e-11
AT3G60320	2489.88	0.808169	0.123045	6.56809	5.09647e-11	3.06049e-09
AT3G60240	5221.48	0.811679	0.155686	5.21355	1.8526e-07	7.25646e-06	EIF4G
AT3G20770	3295.84	0.812085	0.120029	6.76572	1.32651e-11	8.55879e-10	EIN3
AT3G61100	150.287	0.812192	0.193929	4.18809	2.81318e-05	0.000754863
AT3G59770	2547.98	0.814572	0.16052	5.07458	3.88346e-07	1.47195e-05	SAC9
AT3G60910	433.908	0.816574	0.125188	6.52278	6.90179e-11	4.10749e-09
AT1G70420	186.587	0.81782	0.176256	4.63996	3.48471e-06	0.000113706
AT3G60030	2469.09	0.817969	0.109028	7.50235	6.26827e-14	5.16407e-12	SPL12
AT4G24700	213.133	0.82204	0.162051	5.07273	3.92158e-07	1.48077e-05
AT3G59350	1048.36	0.8232	0.114347	7.19911	6.06047e-13	4.52538e-11
AT1G54260	249.219	0.829779	0.176863	4.69165	2.71011e-06	8.99026e-05
AT1G19940	76.1535	0.835737	0.225185	3.71133	0.000206169	0.00449715	AtGH9B5
AT3G58070	128.478	0.837658	0.191225	4.38048	1.18421e-05	0.000345793	GIS
AT3G60860	2215.94	0.838065	0.150661	5.5626	2.65785e-08	1.18811e-06
AT2G25150	79.6715	0.839389	0.273584	3.06813	0.00215405	0.0331823
AT3G20780	330.219	0.842388	0.154401	5.45584	4.87431e-08	2.10943e-06	ATTOP6B
AT4G24260	58.3638	0.843134	0.26683	3.15981	0.0015787	0.0256099	ATGH9A3
AT3G59090	977.22	0.843467	0.108459	7.77684	7.43573e-15	6.80028e-13
AT3G59600	906.493	0.843537	0.112448	7.5016	6.30436e-14	5.17243e-12	NRPB8B
AT3G60840	320.193	0.847487	0.145565	5.82206	5.81257e-09	2.85432e-07	MAP65-4
AT3G60360	327.725	0.853235	0.129603	6.58344	4.59676e-11	2.79407e-09	EDA14
AT1G56650	123.426	0.855269	0.20345	4.20382	2.6245e-05	0.000710934	PAP1
AT1G24260	44.7764	0.855644	0.285253	2.99959	0.00270339	0.0399537	SEP3
AT3G61200	813.558	0.856443	0.123188	6.95234	3.59275e-12	2.4871e-10
AT3G59100	768.54	0.858725	0.165979	5.17369	2.29516e-07	8.93725e-06	ATGSL11
AT3G20740	558.269	0.861371	0.128978	6.67843	2.41521e-11	1.51899e-09	FIE
AT3G59750	47.8836	0.863357	0.28991	2.97801	0.00290123	0.0420668
AT1G26770	1742.64	0.865995	0.116881	7.40923	1.27038e-13	1.01717e-11	ATEXPA10
AT3G20550	602.985	0.866583	0.118156	7.33426	2.22956e-13	1.75003e-11	DDL
AT3G59970	11652.6	0.86755	0.106164	8.17177	3.03901e-16	3.20575e-14	MTHFR1
AT3G61350	126.495	0.868074	0.196715	4.41286	1.02012e-05	0.000301753	SKIP4
AT4G01060	69.3874	0.874046	0.29769	2.9361	0.00332369	0.046534	ETC3
AT5G55620	738.428	0.876752	0.133235	6.58048	4.6894e-11	2.84172e-09
AT3G59520	208.14	0.879056	0.161601	5.43967	5.33806e-08	2.27404e-06	ATRBL13
AT5G28910	155.905	0.882884	0.179764	4.91134	9.04549e-07	3.24353e-05
AT5G52070	150.212	0.883895	0.185192	4.77285	1.81636e-06	6.16913e-05
AT3G60850	557.79	0.88641	0.113366	7.81902	5.32344e-15	4.98279e-13
AT3G20720	1038.95	0.892313	0.143623	6.21286	5.20286e-10	2.8111e-08
AT3G61240	1895.34	0.892921	0.108735	8.21191	2.17693e-16	2.33341e-14
AT5G57780	157.641	0.895962	0.219218	4.08708	4.36829e-05	0.00110943
AT1G01250	65.6523	0.896552	0.261463	3.42899	0.000605842	0.011449
AT3G61180	904.349	0.901691	0.103228	8.73496	2.43751e-18	3.09532e-16
AT1G61800	50.6621	0.902533	0.269319	3.35117	0.000804722	0.0145324	GPT2
AT3G45210	268.304	0.90316	0.169886	5.31627	1.05919e-07	4.30081e-06
AT3G60740	787.486	0.903324	0.153032	5.90285	3.57274e-09	1.80328e-07	TTN1
AT3G59110	762.437	0.904011	0.11277	8.01645	1.08847e-15	1.08504e-13
AT1G25277	49.386	0.904505	0.273722	3.30446	0.000951597	0.0167518
AT5G07570	53.0912	0.905532	0.273172	3.31488	0.000916815	0.0162188
AT3G17640	415.988	0.907377	0.141542	6.41067	1.44884e-10	8.32438e-09
AT3G22210	84.4414	0.911331	0.265239	3.43588	0.000590627	0.0112039
AT3G20830	263.913	0.912293	0.147312	6.19294	5.9051e-10	3.16478e-08
AT3G20640	130.363	0.913205	0.189718	4.8135	1.48311e-06	5.13345e-05
AT5G22580	372.775	0.915373	0.191689	4.77529	1.79447e-06	6.11077e-05
AT3G60220	154.573	0.916482	0.168232	5.44773	5.1018e-08	2.18838e-06	ATL4
AT3G61010	1054.81	0.916932	0.108327	8.46446	2.57345e-17	3.0004e-15
AT3G16150	73.8316	0.92099	0.240883	3.82339	0.00013163	0.0030234
AT1G29395	700.425	0.921297	0.171708	5.3655	8.07233e-08	3.33205e-06	COR414-TM1
AT3G60750	133541	0.929628	0.120962	7.68532	1.52612e-14	1.35832e-12
AT3G08770	942.514	0.930165	0.182778	5.08906	3.59847e-07	1.36913e-05	LTP6
AT4G16920	77.6244	0.931919	0.22375	4.16499	3.11361e-05	0.000826579
AT3G59700	141.638	0.932235	0.189513	4.91911	8.69371e-07	3.13897e-05	ATHLECRK
AT3G59550	160.527	0.933679	0.182077	5.12794	2.92923e-07	1.12524e-05	SYN3
AT3G59150	145.108	0.935644	0.181501	5.15502	2.536e-07	9.81753e-06
AT2G22200	252.477	0.936253	0.164927	5.67676	1.37273e-08	6.40938e-07
AT3G61415	342.174	0.937479	0.129656	7.23051	4.81182e-13	3.63383e-11	ASK21
AT3G60190	1953.31	0.938291	0.0970164	9.67147	3.98601e-22	7.03266e-20	ADL4
AT1G18100	60.449	0.938867	0.253978	3.69664	0.000218469	0.00471506	E12A11
AT3G59470	217.489	0.942573	0.163369	5.76959	7.94669e-09	3.82689e-07
AT3G59990	2258.35	0.942672	0.0980361	9.61557	6.873e-22	1.16125e-19	MAP2B
AT3G20800	954.158	0.94319	0.103422	9.11979	7.52703e-20	1.09756e-17
AT5G22460	57.4228	0.943194	0.26799	3.51952	0.000432335	0.00857657
AT1G69610	169.104	0.943504	0.184138	5.1239	2.99284e-07	1.14747e-05
AT3G59950	999.701	0.943887	0.107999	8.73977	2.33584e-18	2.98523e-16
AT3G60880	699.954	0.944015	0.115885	8.14612	3.75801e-16	3.92269e-14	DHDPS
AT3G59690	50.8755	0.945483	0.323254	2.92489	0.00344577	0.04784	IQD13
AT3G60500	558.515	0.946404	0.12554	7.53865	4.74852e-14	3.97778e-12	CER7
AT3G60110	209.567	0.948383	0.157766	6.01134	1.83996e-09	9.47886e-08
AT3G59640	313.066	0.949001	0.148662	6.38362	1.72954e-10	9.76822e-09
AT3G59580	93.895	0.95131	0.205652	4.62583	3.73093e-06	0.000121146
AT4G33040	103.548	0.951822	0.226616	4.20016	2.6673e-05	0.000719595
AT3G61270	258.481	0.952438	0.142791	6.67016	2.5552e-11	1.60198e-09
AT3G59490	300.636	0.952779	0.170126	5.60044	2.13811e-08	9.75458e-07
AT5G55720	50.4356	0.953121	0.286434	3.32754	0.000876155	0.0156382
AT3G59410	774.566	0.957653	0.158434	6.0445	1.49871e-09	7.78118e-08	GCN2
AT3G60720	136.08	0.959649	0.177294	5.41276	6.20607e-08	2.63256e-06	PDLP8
AT4G34550	38.7212	0.959861	0.310241	3.09393	0.00197527	0.0308145
AT3G60260	311.695	0.961291	0.140679	6.83323	8.30218e-12	5.5358e-10
AT3G20570	404.986	0.961706	0.133904	7.18206	6.86707e-13	5.10854e-11	ENODL9
AT1G69530	3085.05	0.971536	0.101124	9.60737	7.44281e-22	1.24695e-19	EXPA1
AT5G64770	1193.01	0.972263	0.17072	5.69509	1.23308e-08	5.81181e-07	RGF9
AT3G19230	37.4958	0.973591	0.317379	3.06759	0.00215789	0.0331897
AT3G59340	219.157	0.976991	0.197979	4.93483	8.02199e-07	2.9132e-05
AT3G61420	767.967	0.977663	0.113466	8.61636	6.91147e-18	8.5058e-16
AT3G59980	1399.3	0.979982	0.0975654	10.0444	9.72795e-24	1.93946e-21
AT3G61410	94.0127	0.980966	0.203728	4.81508	1.47139e-06	5.11048e-05
AT1G16090	102.44	0.981078	0.210453	4.66176	3.13524e-06	0.000103147	WAKL7
AT2G21210	1275.83	0.984803	0.140914	6.9887	2.77443e-12	1.93643e-10
AT3G59800	313.672	0.984885	0.145323	6.77722	1.2251e-11	7.95599e-10
AT3G60820	3263.63	0.984987	0.0898561	10.9618	5.83139e-28	1.73523e-25	PBF1
AT3G59040	1612.38	0.986867	0.107249	9.20167	3.52416e-20	5.36344e-18
AT3G61130	3465.74	0.988764	0.11676	8.46837	2.48858e-17	2.91852e-15	GAUT1
AT3G59380	773.027	0.99206	0.114033	8.69975	3.32618e-18	4.17069e-16	FTA
AT3G20860	310.977	0.993885	0.138669	7.16733	7.64751e-13	5.62614e-11	ATNEK5
AT3G60960	171.76	0.997448	0.16454	6.06204	1.34409e-09	6.99666e-08
AT3G60600	2452.95	0.9986	0.11243	8.88199	6.56735e-19	8.84684e-17	VAP27-1
AT3G60070	302.033	0.998767	0.136609	7.31116	2.64844e-13	2.05455e-11
AT5G08250	53.944	1.00059	0.281578	3.55352	0.000380105	0.00767798
AT3G60380	1039.64	1.00088	0.113445	8.82267	1.11766e-18	1.47568e-16
AT4G38840	523.003	1.00313	0.132188	7.58862	3.23342e-14	2.79068e-12
AT3G20890	395.048	1.00563	0.128489	7.82658	5.01303e-15	4.71438e-13
AT3G59765	148.74	1.00622	0.184869	5.44291	5.24185e-08	2.23783e-06
AT3G59920	5063.98	1.01208	0.0960642	10.5355	5.92737e-26	1.39028e-23	ATGDI2
AT3G61880	105.191	1.01572	0.202042	5.02727	4.97508e-07	1.85053e-05	CYP78A9
AT3G59660	1098.44	1.01862	0.100847	10.1006	5.49062e-24	1.12502e-21
AT3G20790	1540.63	1.0223	0.106755	9.57614	1.00735e-21	1.67363e-19
AT4G26950	62.5305	1.02366	0.274731	3.72603	0.000194517	0.00427572
AT5G15290	34.1347	1.02933	0.34384	2.99363	0.00275679	0.0404645
AT3G20820	2652.83	1.03549	0.0965944	10.72	8.19762e-27	2.15047e-24
AT3G59140	2955.81	1.03674	0.191603	5.41086	6.27214e-08	2.64932e-06	ATMRP14
AT1G73700	46.1583	1.03775	0.282379	3.67502	0.000237829	0.0050985
AT3G59820	1169.94	1.03809	0.151562	6.84926	7.42353e-12	5.01705e-10
AT3G61140	1099.23	1.03985	0.103324	10.064	7.97202e-24	1.60544e-21	FUS6
AT3G20560	521.255	1.04045	0.128818	8.07693	6.64186e-16	6.75606e-14	ATPDIL5-3
AT3G61160	329.117	1.04051	0.14091	7.38417	1.53408e-13	1.21369e-11
AT3G60370	1006.71	1.04261	0.10323	10.0999	5.53003e-24	1.12502e-21
AT3G05945	174.004	1.04323	0.243425	4.28563	1.82225e-05	0.000513865
AT3G59570	209.15	1.04392	0.154941	6.73755	1.61081e-11	1.02276e-09
AT3G60210	1204.94	1.04579	0.108262	9.65984	4.46557e-22	7.74174e-20
AT2G27420	422.621	1.04665	0.137691	7.60141	2.92913e-14	2.53905e-12
AT3G60400	236.928	1.0473	0.157225	6.66116	2.71681e-11	1.69266e-09
AT3G20930	911.583	1.05036	0.117974	8.90325	5.42354e-19	7.35573e-17
AT3G61070	1176.09	1.05154	0.103853	10.1252	4.26945e-24	8.96001e-22	PEX11E
AT3G61440	18127.8	1.05426	0.0860751	12.2482	1.71862e-34	9.01686e-32	CYSC1
AT3G61310	565.096	1.05784	0.151369	6.98853	2.77785e-12	1.93643e-10
AT3G59530	66.0873	1.05837	0.248916	4.25194	2.11925e-05	0.000587643	LAP3
AT3G60510	299.919	1.05977	0.148873	7.11864	1.09e-12	7.96022e-11
AT3G59760	2197.75	1.06189	0.0973879	10.9037	1.10665e-27	3.19757e-25	OASC
AT3G59420	450.025	1.06595	0.136012	7.83717	4.60809e-15	4.3541e-13	ACR4
AT3G60130	1210.4	1.06758	0.110289	9.67982	3.67372e-22	6.53955e-20	BGLU16
AT3G61380	388.242	1.06855	0.141407	7.55654	4.1393e-14	3.52672e-12
AT2G18480	39.6262	1.07392	0.310422	3.45953	0.00054111	0.0103533
AT3G60770	5554.73	1.0774	0.105265	10.2351	1.38066e-24	2.99198e-22
AT3G60250	994.062	1.08092	0.131619	8.21254	2.16567e-16	2.33341e-14	CKB3
AT3G60900	222.573	1.08234	0.181071	5.97744	2.26675e-09	1.15581e-07	FLA10
AT1G29430	56.6736	1.08241	0.263995	4.10012	4.12945e-05	0.0010528
AT1G73630	139.185	1.08279	0.186289	5.81241	6.15805e-09	3.00178e-07
AT3G59630	404.159	1.08458	0.128561	8.43628	3.27593e-17	3.79722e-15
AT3G59360	1125.48	1.08465	0.124946	8.68095	3.92482e-18	4.89057e-16	UTR6
AT3G20650	469.021	1.08524	0.124607	8.70926	3.05862e-18	3.85947e-16
AT3G61250	50.7857	1.08628	0.293967	3.69525	0.000219669	0.00473465	AtMYB17
AT3G60800	544.622	1.08851	0.117268	9.28229	1.6587e-20	2.64557e-18
AT3G59790	35.0298	1.08888	0.337996	3.22159	0.00127481	0.0213579	ATMPK10
AT3G59330	155.239	1.08939	0.183425	5.93916	2.86495e-09	1.4534e-07
AT2G40475	374.745	1.0924	0.13774	7.93088	2.17591e-15	2.09571e-13
AT1G04880	41.3091	1.09322	0.300298	3.64045	0.000272162	0.0057419
AT3G20670	736.818	1.09717	0.152186	7.20944	5.61824e-13	4.21093e-11	HTA13
AT3G61050	2547.42	1.09756	0.097092	11.3043	1.24913e-29	4.52797e-27	NTMC2TYPE4
AT3G60980	294.684	1.10376	0.144548	7.63596	2.24151e-14	1.97268e-12
AT3G59780	10229	1.10836	0.0887654	12.4864	8.85639e-36	4.90472e-33
AT3G59910	1964.88	1.11803	0.0965925	11.5747	5.53806e-31	2.25331e-28
AT3G60680	199.822	1.11811	0.162628	6.87525	6.18816e-12	4.19637e-10
AT5G19470	72.2135	1.11816	0.245383	4.55681	5.19361e-06	0.000164357	atnudt24
AT3G61320	650.86	1.11835	0.121982	9.1681	4.81408e-20	7.21641e-18
AT3G56260	141.16	1.11951	0.193811	5.77627	7.63767e-09	3.69593e-07
AT3G61110	4068.14	1.12071	0.123672	9.06191	1.28182e-19	1.81246e-17	ARS27A
AT3G59500	950.267	1.12073	0.115948	9.66583	4.21204e-22	7.36627e-20
AT3G60440	1052.41	1.12204	0.106406	10.5449	5.36567e-26	1.27352e-23
AT3G20960	240.426	1.12375	0.148853	7.54941	4.37227e-14	3.69364e-12	CYP705A33
AT1G29440	54.9228	1.12677	0.306653	3.67442	0.000238386	0.00510494
AT3G61170	36.2626	1.12821	0.330421	3.41448	0.000639049	0.0120196
AT3G60150	57.0024	1.12822	0.260225	4.33554	1.45403e-05	0.000416508
AT3G59680	125.585	1.12902	0.198559	5.68606	1.30006e-08	6.09866e-07
AT3G61470	49122.8	1.12975	0.100168	11.2785	1.67513e-29	5.96377e-27	LHCA2
AT5G35490	52.719	1.1304	0.273276	4.13646	3.52702e-05	0.000916796	ATMRU1
AT3G60080	811.699	1.13092	0.109013	10.3742	3.24975e-25	7.36254e-23
AT2G15020	650.833	1.13254	0.127872	8.85682	8.23271e-19	1.10158e-16
AT3G59280	995.507	1.13348	0.113395	9.99594	1.58773e-23	3.07327e-21	TXR1
AT1G78170	435.11	1.1338	0.135902	8.34282	7.25425e-17	8.17107e-15
AT3G60590	442.092	1.139	0.125259	9.09313	9.62258e-20	1.38018e-17
AT3G60050	187.111	1.14599	0.168746	6.79125	1.11166e-11	7.2905e-10
AT3G60245	9057.89	1.1465	0.127429	8.9971	2.31754e-19	3.18654e-17
AT3G59540	3185.4	1.14659	0.139966	8.19196	2.56996e-16	2.73997e-14
AT3G60450	764.572	1.14817	0.107573	10.6734	1.35629e-26	3.46672e-24
AT3G59430	168.369	1.14899	0.169555	6.77652	1.23102e-11	7.96844e-10
AT3G60640	213.362	1.15003	0.180154	6.38362	1.72953e-10	9.76822e-09	ATG8G
AT3G60160	217.821	1.15418	0.206186	5.59777	2.17125e-08	9.88317e-07	ATMRP9
AT3G60620	1049.3	1.15721	0.103545	11.1759	5.35198e-29	1.87197e-26	CDS5
AT3G59670	594.572	1.16138	0.138833	8.36534	5.99398e-17	6.82869e-15
AT3G61080	1422.84	1.16145	0.128404	9.04526	1.49307e-19	2.09629e-17
AT3G59650	289.207	1.1619	0.154982	7.49699	6.53006e-14	5.33565e-12
AT3G59840	443.862	1.16226	0.154081	7.54318	4.58644e-14	3.85822e-12
AT3G60830	574.189	1.1634	0.132695	8.76744	1.82777e-18	2.38172e-16	ATARP7
AT3G61430	8574.34	1.16547	0.105704	11.0258	2.86824e-28	9.37445e-26	PIP1A
AT3G59200	36.0476	1.16743	0.319963	3.64863	0.000263639	0.0055798
AT3G59210	864.209	1.16783	0.11508	10.1479	3.3846e-24	7.17859e-22
AT3G59320	375.317	1.16975	0.14863	7.87023	3.53997e-15	3.36078e-13
AT2G46660	137.153	1.17233	0.189056	6.20094	5.61284e-10	3.01626e-08	CYP78A6
AT3G61370	206.188	1.17478	0.180558	6.50639	7.69771e-11	4.56753e-09
AT3G59390	170.365	1.1753	0.166782	7.04695	1.8288e-12	1.29753e-10
AT3G59050	1266.01	1.17577	0.105239	11.1723	5.56951e-29	1.91447e-26	ATPAO3
AT3G59810	606.91	1.18145	0.129905	9.09473	9.48218e-20	1.3699e-17
AT3G60330	510.109	1.19129	0.189749	6.27824	3.4243e-10	1.88623e-08	HA7
AT3G20870	1017.16	1.19142	0.110698	10.7628	5.15694e-27	1.38603e-24	ZTP29
AT3G59880	24.4446	1.19216	0.377563	3.1575	0.00159127	0.0257509
AT3G60660	76.6352	1.19484	0.231721	5.1564	2.51741e-07	9.7645e-06
AT3G59870	685.05	1.19633	0.131076	9.127	7.04249e-20	1.04781e-17
AT3G60810	751.695	1.20117	0.127696	9.40648	5.13048e-21	8.38412e-19
AT3G21890	34.7108	1.20942	0.346497	3.49041	0.000482276	0.00945441
AT3G59710	39.1731	1.21031	0.306259	3.95191	7.75292e-05	0.00186005
AT3G60480	249.089	1.21195	0.166127	7.29535	2.97882e-13	2.29343e-11
AT1G48470	29.633	1.21492	0.360229	3.37263	0.000744541	0.0136308	GLN1;5
AT1G11700	287.572	1.21509	0.178892	6.79233	1.10336e-11	7.25999e-10
AT3G61360	80.8382	1.2154	0.222523	5.46189	4.71088e-08	2.0462e-06
AT5G66740	48.3669	1.21619	0.278771	4.36268	1.2848e-05	0.000371773
AT1G20470	37.7872	1.22094	0.324419	3.76346	0.00016758	0.00377093
AT3G20730	27.767	1.23573	0.371816	3.32351	0.000888928	0.0158096
AT3G59370	234.87	1.23589	0.191534	6.4526	1.09946e-10	6.42811e-09
AT3G20920	1086.58	1.23611	0.114645	10.7821	4.18313e-27	1.14245e-24
AT3G60340	1410.3	1.23906	0.106736	11.6087	3.72356e-31	1.5795e-28
AT3G60180	100.555	1.23922	0.214762	5.77018	7.91853e-09	3.82256e-07
AT1G66390	27.1039	1.24319	0.406636	3.05726	0.00223372	0.0341036	ATMYB90
AT3G60630	992.752	1.24855	0.113774	10.974	5.09929e-28	1.54037e-25	HAM2
AT3G61460	983.364	1.25304	0.12084	10.3694	3.41718e-25	7.65486e-23	BRH1
AT1G06980	30.9567	1.25995	0.361787	3.48256	0.00049664	0.00962245
AT1G06080	137.459	1.2723	0.243231	5.23083	1.68747e-07	6.662e-06	ADS1
AT3G60690	445.781	1.2741	0.141423	9.00914	2.07686e-19	2.87544e-17
AT4G23680	1936.95	1.28517	0.136982	9.38204	6.47076e-21	1.04038e-18
AT5G11190	22.614	1.28866	0.422958	3.04679	0.00231301	0.0351751	SHN3
AT3G59220	520.854	1.29263	0.122355	10.5645	4.35073e-26	1.05781e-23	PRN
AT5G38100	59.3536	1.30175	0.276252	4.71219	2.45069e-06	8.18416e-05
AT3G20940	68.3933	1.30698	0.27098	4.82314	1.41313e-06	4.92546e-05	CYP705A30
AT3G61220	3319.64	1.31135	0.102772	12.7597	2.75114e-37	1.61322e-34
AT4G25010	23.0999	1.32243	0.402518	3.2854	0.00101839	0.017748	SWEET14
AT2G29170	59.3726	1.33074	0.276326	4.81583	1.46593e-06	5.10056e-05
AT5G20710	23.4183	1.33282	0.392584	3.39499	0.000686308	0.0127165	BGAL7
AT1G65480	112.831	1.34226	0.203802	6.5861	4.51525e-11	2.75292e-09	FT
AT1G80130	56.7444	1.36556	0.281375	4.85318	1.215e-06	4.24972e-05
AT3G60520	359.594	1.37345	0.153168	8.96698	3.04761e-19	4.16166e-17
AT3G20898	35.3932	1.41422	0.349669	4.04445	5.24467e-05	0.00131361
AT5G65980	94.5222	1.41523	0.232311	6.09197	1.11529e-09	5.85147e-08
AT5G35480	94.3892	1.41745	0.214697	6.60208	4.05417e-11	2.47939e-09
AT1G16515	19.3099	1.41811	0.473212	2.99677	0.00272854	0.0402061
AT3G20620	389.32	1.41929	0.130678	10.861	1.76745e-27	4.96305e-25
AT5G46140	16.1334	1.43071	0.481306	2.97257	0.00295322	0.0424501
AT2G28270	40.6275	1.43075	0.316491	4.52067	6.16455e-06	0.000192035
AT5G18020	38.2567	1.46443	0.32629	4.48812	7.18536e-06	0.000220392
AT3G62610	16.5261	1.47232	0.490901	2.99921	0.00270677	0.0399739	ATMYB11
AT5G56700	23.2667	1.49225	0.402604	3.7065	0.00021014	0.00456877
AT1G13480	26.467	1.49395	0.380543	3.92582	8.64344e-05	0.00205392
AT3G20935	47.5127	1.4949	0.302564	4.94077	7.78153e-07	2.83103e-05	CYP705A28
AT3G59400	99.0562	1.56324	0.250842	6.23197	4.60612e-10	2.50224e-08	GUN4
AT1G48800	14.6352	1.58489	0.514539	3.08022	0.00206848	0.0320181
AT3G60280	49.2715	1.63507	0.293965	5.56214	2.6649e-08	1.18859e-06	UCC3
AT1G77960	11.7309	1.72585	0.568178	3.03751	0.00238538	0.0360556
AT3G59730	23.7463	1.73046	0.432579	4.00034	6.32525e-05	0.00155304
AT3G20590	14.2469	1.73594	0.54252	3.19977	0.00137537	0.0227558
AT3G59900	34.1075	1.76745	0.348835	5.06672	4.04725e-07	1.51959e-05	ARGOS
AT3G61113	37.3639	1.77204	0.324957	5.45315	4.9486e-08	2.13089e-06
AT1G29460	38.2232	1.78901	0.340455	5.25476	1.48215e-07	5.89812e-06
AT3G13130	11.5484	1.88385	0.598953	3.14524	0.00165952	0.0267036
AT5G18030	32.6508	1.89318	0.387349	4.88754	1.02104e-06	3.62861e-05
AT3G20865	15.4693	1.90129	0.501374	3.79215	0.000149347	0.00339901	AGP40
AT3G59250	93.6071	1.95803	0.23301	8.40319	4.34501e-17	5.00731e-15
AT3G50610	29.4517	2.01647	0.419296	4.80919	1.51545e-06	5.23632e-05
AT4G27360	8.88146	2.12291	0.704203	3.01462	0.00257302	0.0382538
AT2G34655	8.79303	2.17905	0.739452	2.94684	0.00321036	0.0453936
AT3G27620	8.57961	2.57761	0.746974	3.45074	0.000559053	0.0106455	AOX1C
AT5G50790	14.8689	2.89681	0.621532	4.66075	3.15052e-06	0.000103309	SWEET10
AT4G38850	10.5876	2.94531	0.708178	4.15899	3.19651e-05	0.000847458	SAUR_AC1
AT4G13420	63.9818	3.6205	0.350022	10.3436	4.47283e-25	9.90832e-23	HAK5
AT5G66830	78.7085	4.51952	0.387358	11.6676	1.86684e-31	8.27095e-29
AT1G75945	56.4461	6.01442	0.703613	8.54791	1.2534e-17	1.49635e-15
AT1G64795	21.9198	6.86789	1.24578	5.5129	3.52973e-08	1.55347e-06

## Sheet: jmj13-1
gene	baseMean	log2FoldChange	lfcSE	stat	pvalue	padj	tair_symbol
AT2G34600	160.924	-2.37111	0.185139	-12.8072	1.49493e-37	9.69862e-34	JAZ7
AT5G47000	29.1833	-2.16784	0.428852	-5.05498	4.30446e-07	9.85621e-05
AT5G10140	16.638	-2.09556	0.536593	-3.9053	9.41094e-05	0.00906758	FLC
AT5G08150	45.5384	-1.86431	0.319762	-5.83032	5.53222e-09	2.36857e-06	SOB5
AT2G39510	41.9857	-1.84722	0.352351	-5.24255	1.58374e-07	4.16546e-05
AT3G29644	56.4748	-1.74503	0.292031	-5.97549	2.29401e-09	1.11621e-06
AT1G74290	26.1109	-1.64373	0.427597	-3.84411	0.000120989	0.0107525
AT5G51790	27.8055	-1.61853	0.397984	-4.06683	4.76569e-05	0.00533073
AT4G13575	114.886	-1.59998	0.21501	-7.44143	9.96041e-14	1.14035e-10
AT3G20395	28.0731	-1.46931	0.407272	-3.60769	0.000308932	0.0233052
AT5G41761	37.3904	-1.39735	0.350068	-3.99166	6.5613e-05	0.00682901
AT1G05675	34.2361	-1.32407	0.384034	-3.4478	0.000565181	0.036066
AT2G29300	220.256	-1.32061	0.154617	-8.54117	1.32872e-17	2.87344e-14
AT4G31940	66.6415	-1.29351	0.280282	-4.61503	3.93039e-06	0.000632208	CYP82C4
AT2G27690	48.8491	-1.2785	0.309495	-4.13094	3.6128e-05	0.00431386	CYP94C1
AT5G43580	283.817	-1.24888	0.149675	-8.34392	7.18655e-17	1.39872e-13
AT4G20230	85.7511	-1.22001	0.229127	-5.32458	1.01185e-07	2.85416e-05
AT4G19690	361.026	-1.21729	0.16198	-7.51505	5.68883e-14	6.92011e-11	IRT1
AT2G28990	85.4473	-1.17357	0.248905	-4.71491	2.41816e-06	0.000409258
AT1G53490	35.1086	-1.16744	0.346651	-3.36778	0.000757749	0.0452395
AT1G50040	53.4234	-1.14654	0.287818	-3.98356	6.78903e-05	0.00695447
AT1G72520	365.418	-1.13247	0.14301	-7.9188	2.39814e-15	3.33393e-12	LOX4
AT3G15500	100.836	-1.10122	0.206597	-5.3303	9.80482e-08	2.82844e-05	ATNAC3
AT3G21370	60.5231	-1.07059	0.309843	-3.45526	0.000549762	0.0354306	BGLU19
AT5G57220	221.265	-1.06787	0.194705	-5.48453	4.14562e-08	1.32273e-05	CYP81F2
AT1G02660	422.085	-1.03701	0.125424	-8.26804	1.36173e-16	2.4094e-13
AT1G01580	167.37	-1.00239	0.187846	-5.3362	9.49161e-08	2.81541e-05	FRO2
AT5G48850	1805.5	-1.00122	0.0889244	-11.2592	2.08577e-29	8.11907e-26	ATSDI1
AT1G05700	93.3547	-0.972005	0.241118	-4.03125	5.54815e-05	0.00596595
AT4G37390	90.2603	-0.966318	0.223375	-4.32598	1.51854e-05	0.00201057	YDK1
AT4G14060	88.3094	-0.947959	0.249144	-3.80487	0.000141882	0.0124952
AT5G22920	1629.52	-0.942593	0.205993	-4.57586	4.74272e-06	0.000744416
AT2G15880	136.743	-0.911719	0.190997	-4.77348	1.81073e-06	0.000323323
AT2G28960	157.012	-0.898019	0.173909	-5.16372	2.42089e-07	6.04075e-05
AT1G74930	471.368	-0.858695	0.121955	-7.0411	1.90732e-12	1.61671e-09	ORA47
AT1G36370	5116.65	-0.855452	0.0679732	-12.5851	2.54893e-36	1.24024e-32	SHM7
AT1G70290	2187.73	-0.853968	0.104898	-8.14093	3.9226e-16	6.36213e-13	ATTPS8
AT4G19810	382.006	-0.847384	0.138512	-6.11778	9.48854e-10	4.85988e-07
AT2G18700	854.981	-0.825574	0.119134	-6.92979	4.21458e-12	3.28114e-09	ATTPS11
AT2G43590	1374.87	-0.801951	0.115208	-6.96089	3.38134e-12	2.74213e-09
AT5G51780	89.482	-0.790593	0.225135	-3.51164	0.000445347	0.0302013
AT4G36850	674.876	-0.760399	0.136126	-5.58597	2.32396e-08	8.077e-06
AT3G49570	603.078	-0.755939	0.101784	-7.42686	1.11205e-13	1.20244e-10	LSU3
AT1G72450	1057.16	-0.753507	0.0841603	-8.95324	3.45214e-19	1.11982e-15	JAZ6
AT3G46280	281.05	-0.750798	0.167993	-4.46923	7.85005e-06	0.00112342
AT1G08930	2904.47	-0.7239	0.0828837	-8.73393	2.45983e-18	5.98447e-15	ERD6
AT1G78450	262.426	-0.715195	0.153627	-4.65539	3.23374e-06	0.000528894
AT5G47240	206.853	-0.698047	0.156101	-4.47176	7.75781e-06	0.00111845	atnudt8
AT2G41100	2058.58	-0.694427	0.201153	-3.45224	0.000555953	0.0355938	TCH3
AT1G06830	112.394	-0.680923	0.19165	-3.55295	0.000380934	0.0270588
AT2G39850	231.222	-0.678695	0.141293	-4.80346	1.55949e-06	0.000283667
AT3G16660	727.759	-0.678285	0.137097	-4.9475	7.5173e-07	0.000155648
AT5G05060	431.206	-0.657119	0.109047	-6.02599	1.68075e-09	8.38778e-07
AT5G17220	361.727	-0.652421	0.158751	-4.10971	3.9616e-05	0.00464486	ATGSTF12
AT5G49360	2814.87	-0.645553	0.112846	-5.72065	1.06116e-08	4.04968e-06	BXL1
AT5G11250	415.825	-0.642154	0.126948	-5.05839	4.22811e-07	9.79664e-05
AT1G20510	990.329	-0.631668	0.0993089	-6.36064	2.0092e-10	1.15015e-07	OPCL1
AT5G63600	936.049	-0.629671	0.112698	-5.58726	2.30683e-08	8.077e-06	FLS5
AT2G27310	278.416	-0.608298	0.134824	-4.51178	6.42869e-06	0.000947891
AT5G23130	148.329	-0.596981	0.175602	-3.39962	0.000674801	0.0413008
AT5G41080	804.994	-0.59474	0.123865	-4.80153	1.57461e-06	0.000283766
AT5G54710	602.508	-0.594087	0.114077	-5.20779	1.91106e-07	4.95933e-05
AT5G41740	586.094	-0.592975	0.107103	-5.53649	3.08591e-08	1.03554e-05
AT5G51550	1402.49	-0.589746	0.0771827	-7.64091	2.15694e-14	2.7987e-11	EXL3
AT1G52100	963.607	-0.586064	0.113883	-5.14617	2.6586e-07	6.46805e-05
AT1G21460	545.365	-0.578932	0.104671	-5.53099	3.18421e-08	1.05041e-05	SWEET1
AT1G74950	855.81	-0.578861	0.0986267	-5.86921	4.37878e-09	2.04267e-06	JAZ2
AT5G05440	868.628	-0.578822	0.0995567	-5.81399	6.10005e-09	2.52607e-06	PYL5
AT3G60520	160.619	-0.578788	0.165248	-3.50254	0.000460848	0.030823
AT4G28940	476.673	-0.575902	0.14709	-3.91529	9.02954e-05	0.00874338
AT3G15630	895.756	-0.575005	0.126121	-4.55914	5.13623e-06	0.000799732
AT5G26220	481.066	-0.570972	0.113751	-5.01949	5.18086e-07	0.000114585
AT1G08830	750.211	-0.567649	0.0989929	-5.73424	9.79526e-09	3.8129e-06	CSD1
AT2G18980	575.656	-0.567323	0.127619	-4.44544	8.77112e-06	0.00123705
AT1G70700	2865.59	-0.564599	0.0860211	-6.5635	5.256e-11	3.29992e-08	TIFY7
AT4G14680	1080.73	-0.564141	0.0842845	-6.6933	2.182e-11	1.51673e-08	APS3
AT1G11380	270.809	-0.559925	0.131312	-4.26408	2.00725e-05	0.00260447
AT5G20250	9513.42	-0.546052	0.0978997	-5.57767	2.43764e-08	8.32348e-06	DIN10
AT1G22590	494.674	-0.530564	0.103159	-5.14316	2.70156e-07	6.49141e-05	AGL87
AT1G66090	435.484	-0.529735	0.147876	-3.58229	0.000340601	0.0251103
AT3G49790	510.833	-0.520961	0.150572	-3.45989	0.000540403	0.0350595
AT5G50200	342.758	-0.518337	0.139633	-3.71213	0.000205522	0.0171677	WR3
AT1G12200	613.575	-0.516695	0.113503	-4.55227	5.30711e-06	0.000806971
AT5G24210	1806.63	-0.51328	0.107945	-4.75503	1.98418e-06	0.000351073
AT1G21910	407.407	-0.513185	0.146685	-3.49855	0.000467801	0.0310745	DREB26
AT5G63160	5449.56	-0.512937	0.0723238	-7.09223	1.31968e-12	1.22309e-09	BT1
AT3G10985	1312.26	-0.51195	0.0757459	-6.75878	1.39156e-11	1.00311e-08	SAG20
AT1G49500	1835.6	-0.511413	0.0872423	-5.86198	4.57376e-09	2.07021e-06
AT4G30510	203.583	-0.507374	0.146954	-3.45261	0.000555183	0.0355938	ATATG18B
AT4G17500	980.38	-0.503908	0.0957692	-5.26169	1.42738e-07	3.91283e-05	ATERF-1
AT5G65730	1368.16	-0.503142	0.0809035	-6.21904	5.00205e-10	2.7043e-07	XTH6
AT2G17230	890.344	-0.502864	0.0896369	-5.61001	2.02314e-08	7.29193e-06	EXL5
AT1G75960	338.506	-0.501561	0.126558	-3.96308	7.39902e-05	0.00738498
AT4G01330	730.028	-0.500394	0.100584	-4.97491	6.52781e-07	0.000138099
AT5G13580	712.469	0.503233	0.123641	4.07013	4.69878e-05	0.005317
AT1G67865	453.846	0.504905	0.112072	4.50519	6.63136e-06	0.000970423
AT4G33610	725.353	0.526398	0.134439	3.91552	9.02097e-05	0.00874338
AT2G22500	520.181	0.531073	0.12047	4.40834	1.04167e-05	0.00143787	UCP5
AT5G09530	2665.23	0.532058	0.10297	5.16714	2.377e-07	6.00825e-05
AT5G65870	204.966	0.543507	0.15006	3.62194	0.000292406	0.0224059	ATPSK5
AT5G17420	449.125	0.548034	0.122059	4.48992	7.12515e-06	0.0010349	IRX3
AT2G45660	417.381	0.550401	0.116613	4.71988	2.35984e-06	0.000402891	AGL20
AT1G54040	360.974	0.551991	0.154766	3.56662	0.000361616	0.0262617	ESP
AT1G11700	205.176	0.552091	0.164496	3.35626	0.000790051	0.0464555
AT3G04720	2559.02	0.554664	0.0838791	6.61266	3.77469e-11	2.4489e-08	PR4
AT2G46270	223.097	0.563273	0.146379	3.84804	0.000119065	0.0106791	GBF3
AT1G55990	446.837	0.585203	0.143766	4.07053	4.69056e-05	0.005317
AT5G09520	400.283	0.611195	0.14685	4.16203	3.15431e-05	0.00384324
AT1G19960	293.11	0.630488	0.180364	3.49565	0.00047291	0.031307
AT3G55710	217.61	0.635962	0.157859	4.02866	5.60947e-05	0.00599874
AT3G05945	139.565	0.639119	0.176628	3.61845	0.000296376	0.0225566
AT1G69610	142.565	0.646117	0.180547	3.57866	0.000345363	0.0252699
AT3G46620	696.367	0.665881	0.105304	6.32339	2.5588e-10	1.42291e-07
AT1G73010	244.173	0.666312	0.167575	3.9762	7.00263e-05	0.00706177	ATPS2
AT3G43790	99.7901	0.681575	0.20289	3.35933	0.000781316	0.0462211	ZIFL2
AT3G50930	230.111	0.692379	0.155485	4.45303	8.46663e-06	0.00120282	BCS1
AT3G44260	875.432	0.700551	0.108954	6.42981	1.27767e-10	7.53557e-08
AT4G29780	349.246	0.713433	0.16526	4.31702	1.58148e-05	0.00207975
AT2G29090	296.163	0.737549	0.135276	5.4522	4.97509e-08	1.56178e-05	CYP707A2
AT1G17710	106.871	0.751702	0.214517	3.50416	0.000458048	0.0307414
AT1G06080	104.357	0.764076	0.218638	3.49471	0.000474577	0.0313108	ADS1
AT4G27652	105.735	0.783584	0.211002	3.71364	0.0002043	0.0171571
AT4G12480	2486.34	0.785989	0.0976968	8.04519	8.61131e-16	1.28925e-12	pEARLI 1
AT1G23730	109.841	0.786374	0.230917	3.40544	0.000660575	0.0406063	ATBCA3
AT1G76960	157.731	0.797651	0.207192	3.84982	0.000118206	0.0106791
AT2G40435	77.907	0.802253	0.227979	3.51897	0.000433223	0.0295853
AT1G65480	84.3669	0.80779	0.232373	3.47627	0.000508449	0.0332079	FT
AT1G04220	166.285	0.844814	0.175171	4.8228	1.41558e-06	0.000264918	KCS2
AT2G37870	74.7224	0.881289	0.253348	3.47858	0.000504085	0.0330337
AT4G38530	65.557	0.914	0.257649	3.54746	0.000388965	0.0274318	ATPLC1
AT4G10310	77.8883	0.92695	0.245118	3.78165	0.00015579	0.0135896	HKT1
AT3G55090	74.8004	0.942451	0.244778	3.85023	0.000118008	0.0106791
AT1G23110	86.7319	0.954731	0.234367	4.07366	4.62796e-05	0.00529847
AT1G71200	78.6621	0.958831	0.259149	3.69992	0.000215669	0.017862
AT5G26270	278.309	0.964332	0.133094	7.24549	4.30887e-13	4.2102e-10
AT5G17350	68.017	0.977185	0.28838	3.38853	0.000702674	0.0424725
AT3G61190	74.7053	0.995579	0.246898	4.03235	5.52227e-05	0.00596595	BAP1
AT2G02990	46.4443	1.08365	0.299503	3.61817	0.00029669	0.0225566	RNS1
AT5G08250	55.1207	1.13048	0.301536	3.74907	0.000177494	0.0152184
AT3G50800	256.751	1.28795	0.364526	3.5332	0.000410557	0.0286404
AT3G30720	129.107	1.45937	0.207272	7.04086	1.91052e-12	1.61671e-09	QQS
AT3G09922	93.7708	1.59155	0.277324	5.73896	9.52621e-09	3.78385e-06	IPS1
AT1G19610	37.007	1.59303	0.35144	4.53288	5.8184e-06	0.000877857	LCR78
AT4G10500	19.9679	1.67079	0.4973	3.35972	0.000780211	0.0462211
AT3G55970	27.5048	1.73486	0.428438	4.04926	5.13796e-05	0.00564973	ATJRG21
AT2G26010	621.207	1.93424	0.138739	13.9416	3.53769e-44	3.4427e-40	PDF1.3
AT3G59930	65.4614	2.04996	0.298309	6.87192	6.33456e-12	4.74191e-09
AT3G27940	26.7316	2.13047	0.430368	4.95033	7.40878e-07	0.000155051	LBD26
AT2G26020	94.5686	2.15584	0.242994	8.87199	7.18513e-19	1.99778e-15	PDF1.2b
AT2G01422	25.1045	2.54807	0.468909	5.43404	5.5092e-08	1.70199e-05
AT1G77960	18.0688	2.55965	0.565656	4.5251	6.03658e-06	0.000899833
AT2G05995	14.8007	2.69	0.616555	4.36296	1.28314e-05	0.00172233
AT5G44420	224.266	3.15524	0.218486	14.4414	2.84209e-47	5.53156e-43	PDF1.2
AT5G44430	151.501	3.1627	0.514799	6.14356	8.06903e-10	4.24453e-07	PDF1.2c

## Sheet: elf6-3 jmj13-1
gene	baseMean	log2FoldChange	lfcSE	stat	pvalue	padj	tair_symbol
AT2G43150	19014	0.500443	0.0715949	6.98992	2.75039e-12	1.56933e-10
AT4G14020	420.212	0.500768	0.117388	4.26592	1.99082e-05	0.000356738
AT5G55180	800.687	0.501338	0.0873083	5.74216	9.34791e-09	3.32874e-07
AT3G61310	414.123	0.50148	0.11957	4.19403	2.74039e-05	0.000477039
AT3G13610	494.474	0.502715	0.119895	4.19296	2.75339e-05	0.000478447
AT2G36750	326.495	0.503129	0.156318	3.21863	0.00128804	0.0126179	UGT73C1
AT5G49630	237.545	0.503319	0.128525	3.91611	8.99894e-05	0.00131441	AAP6
AT3G19710	1970.9	0.505239	0.0860094	5.87423	4.24812e-09	1.58839e-07	BCAT4
AT5G01340	395.959	0.506608	0.106421	4.7604	1.9321e-06	4.57006e-05
AT1G32900	923.769	0.506626	0.0917093	5.52426	3.30881e-08	1.07614e-06
AT1G60640	409.109	0.506686	0.110783	4.5737	4.79182e-06	0.000103209
AT5G19300	169.918	0.506693	0.15384	3.29362	0.000989048	0.0100996
AT1G78990	362.797	0.507396	0.112813	4.49768	6.86974e-06	0.000142944
AT2G46750	232.039	0.508097	0.162361	3.12943	0.00175144	0.0161443
AT2G24980	235.163	0.509191	0.138455	3.67766	0.000235386	0.00302192
AT3G60350	784.796	0.509868	0.0896659	5.68631	1.29811e-08	4.49936e-07	ARABIDILLO-2
AT4G21760	157.405	0.510828	0.159145	3.20982	0.00132818	0.0129074	BGLU47
AT2G42610	123.168	0.511074	0.182342	2.80283	0.00506559	0.0377578	LSH10
AT3G59780	7348.95	0.511799	0.0536614	9.53755	1.46247e-21	2.02402e-19
AT1G01390	185.833	0.512137	0.148572	3.44705	0.000566734	0.00635954
AT1G32860	183.666	0.51321	0.15377	3.33753	0.000845276	0.00888724
AT3G59380	586.91	0.5135	0.0933967	5.49805	3.84013e-08	1.23657e-06	FTA
AT4G05410	370.595	0.514504	0.123236	4.17494	2.98069e-05	0.000513373	YAO
AT3G03440	115.568	0.515865	0.184232	2.80008	0.00510893	0.0379684
AT3G59970	9376.71	0.517606	0.056464	9.16702	4.86297e-20	5.85777e-18	MTHFR1
AT2G43110	236.261	0.517646	0.143087	3.6177	0.000297232	0.00370618
AT5G27120	1253.48	0.517786	0.10268	5.04273	4.58945e-07	1.23189e-05
AT3G59950	777.844	0.520824	0.0878142	5.93097	3.01147e-09	1.15453e-07
AT1G50520	109.656	0.521721	0.188329	2.77026	0.00560114	0.0407433	CYP705A27
AT3G25590	150.006	0.522593	0.160835	3.24926	0.00115707	0.0115024
AT1G52160	249.824	0.522695	0.15856	3.2965	0.000978972	0.0100292	TRZ3
AT3G50930	208.55	0.524531	0.158182	3.31599	0.000913185	0.00945854	BCS1
AT1G76130	494.179	0.524714	0.102312	5.12855	2.91979e-07	8.16287e-06	ATAMY2
AT3G15030	898.355	0.524778	0.0834048	6.29193	3.13537e-10	1.38739e-08	TCP4
AT5G14580	254.273	0.525168	0.146525	3.58415	0.000338181	0.00413487
AT5G57280	264.489	0.52555	0.139985	3.75432	0.000173816	0.00231367
AT1G65370	217.206	0.52602	0.152751	3.44365	0.000573912	0.006429
AT3G14900	225.309	0.527694	0.148554	3.55219	0.000382032	0.00455962
AT2G40900	422.909	0.528362	0.110523	4.78058	1.74793e-06	4.15458e-05
AT4G31500	4571.84	0.529374	0.0772698	6.85098	7.33441e-12	3.97351e-10	CYP83B1
AT4G05390	1079.42	0.530311	0.0897183	5.91085	3.40353e-09	1.29467e-07	RFNR1
AT3G48340	534.924	0.530426	0.111921	4.73927	2.1449e-06	4.98875e-05
AT3G05690	155.271	0.530531	0.162935	3.25609	0.00112957	0.0112749	UNE8
AT3G04030	130.932	0.530535	0.173147	3.06408	0.00218344	0.0191754
AT2G22560	180.172	0.530556	0.15036	3.52858	0.00041779	0.00492316
AT3G20100	477.041	0.530801	0.101261	5.24192	1.58913e-07	4.6562e-06	CYP705A19
AT5G13580	700.664	0.531128	0.110312	4.81478	1.47364e-06	3.559e-05
AT1G44960	169.807	0.531299	0.15492	3.42951	0.000604665	0.00670804
AT5G06550	193.706	0.531713	0.150252	3.53882	0.000401921	0.00475339
AT5G61030	532.852	0.532129	0.108283	4.91426	8.91173e-07	2.23814e-05	GR-RBP3
AT1G10270	305.135	0.532378	0.134262	3.96521	7.33325e-05	0.00110332	GRP23
AT3G04070	105.641	0.533516	0.194627	2.74123	0.00612103	0.0435298	anac047
AT3G60250	730.2	0.534041	0.0922841	5.78693	7.16856e-09	2.59531e-07	CKB3
AT3G60680	144.247	0.534331	0.173711	3.07598	0.0020981	0.0185989
AT3G26210	156.911	0.534484	0.174894	3.05605	0.00224277	0.0195906	CYP71B23
AT2G40475	273.921	0.53578	0.122776	4.36389	1.2777e-05	0.000245163
AT2G23910	867.944	0.535805	0.0919698	5.82589	5.68106e-09	2.08384e-07
AT4G17030	289.615	0.537736	0.137242	3.91815	8.92319e-05	0.0013053	ATEXLB1
AT2G41150	112.42	0.539037	0.190473	2.82998	0.00465504	0.0352176
AT3G16810	619.56	0.539399	0.100813	5.35049	8.77172e-08	2.67038e-06	APUM24
AT1G56430	538.623	0.539508	0.100056	5.39207	6.96503e-08	2.16082e-06	ATNAS4
AT3G61070	877.595	0.53954	0.0865812	6.23161	4.61661e-10	1.98103e-08	PEX11E
AT1G20160	239.469	0.539803	0.131449	4.10657	4.01583e-05	0.000656873	ATSBT5.2
AT3G59470	170.908	0.542162	0.14867	3.64676	0.000265569	0.00336295
AT5G06640	344.569	0.543446	0.146707	3.70429	0.000211983	0.00277255
AT4G26600	322.382	0.543672	0.141477	3.84283	0.000121625	0.00171117
AT5G60460	166.055	0.544922	0.15436	3.53019	0.000415259	0.00489629
AT3G12750	92.0036	0.545156	0.200803	2.71489	0.00662986	0.0461749	ZIP1
AT3G59390	120.142	0.545899	0.179176	3.04671	0.00231358	0.0201191
AT3G62040	370.835	0.54761	0.120762	4.53462	5.77065e-06	0.000121739
AT2G15020	469.218	0.548446	0.109468	5.01009	5.4404e-07	1.43078e-05
AT3G17640	333.367	0.5502	0.120512	4.56551	4.98271e-06	0.000106732
AT2G32220	145.55	0.55022	0.16795	3.27609	0.00105255	0.0106477
AT3G61220	2196.34	0.550804	0.0745705	7.38635	1.50913e-13	9.75136e-12
AT2G46290	102.312	0.550828	0.192367	2.86343	0.00419087	0.0324527
AT3G59290	560.452	0.550887	0.0936323	5.88351	4.0166e-09	1.51021e-07
AT3G61440	13578.2	0.551505	0.0643898	8.5651	1.07983e-17	1.06964e-15	CYSC1
AT1G07260	119.457	0.551967	0.176348	3.12998	0.00174819	0.0161297	UGT71C3
AT3G59910	1428.69	0.552061	0.0701205	7.87304	3.4613e-15	2.76819e-13
AT1G44800	762.185	0.553504	0.100628	5.50048	3.78758e-08	1.22369e-06
AT3G61050	1871.91	0.554276	0.0668381	8.29281	1.10604e-16	1.00387e-14	NTMC2TYPE4
AT2G46630	319.066	0.554291	0.126358	4.38666	1.15103e-05	0.00022427
AT5G28300	411.991	0.554398	0.10595	5.23262	1.67124e-07	4.8603e-06
AT3G60860	1835.05	0.555413	0.0734131	7.56559	3.86114e-14	2.75993e-12
AT3G60380	800.143	0.556834	0.0830686	6.70331	2.03757e-11	1.03545e-09
AT4G15480	250.319	0.558577	0.143323	3.89733	9.72585e-05	0.00140794	UGT84A1
AT3G60130	903.584	0.559036	0.0905291	6.17521	6.6075e-10	2.73175e-08	BGLU16
AT3G59050	897.871	0.559037	0.0800278	6.98554	2.83769e-12	1.60973e-10	ATPAO3
AT4G04940	415.726	0.559413	0.138048	4.05229	5.0718e-05	0.000803989
AT3G60190	1548.79	0.559825	0.0730599	7.66256	1.82269e-14	1.34039e-12	ADL4
AT3G22310	743.119	0.560533	0.10455	5.36138	8.25893e-08	2.53006e-06	PMH1
AT1G71850	158.039	0.560794	0.158455	3.53914	0.000401438	0.00475119
AT3G59550	127.737	0.562698	0.17098	3.29101	0.000998283	0.0101726	SYN3
AT1G12010	185.04	0.563152	0.157837	3.56793	0.00035981	0.00435483
AT5G09530	2625.39	0.563268	0.0853513	6.5994	4.12818e-11	2.01393e-09
AT2G39220	243.53	0.563311	0.135045	4.1713	3.02865e-05	0.000518885	PLP6
AT3G48450	102.582	0.564195	0.193027	2.92288	0.00346809	0.0279572
AT5G22100	329.386	0.564887	0.132103	4.27611	1.90189e-05	0.000345563
AT5G10580	225.406	0.565814	0.155541	3.63772	0.000275065	0.00347195
AT3G54580	2509.52	0.566503	0.0916511	6.18108	6.36652e-10	2.6603e-08
AT3G61010	846.812	0.566851	0.084199	6.73228	1.67021e-11	8.50978e-10
AT3G09440	9943.99	0.56784	0.0819772	6.92681	4.30449e-12	2.37954e-10
AT3G59570	158.757	0.569634	0.162223	3.51142	0.000445714	0.00518335
AT1G68850	249.824	0.571393	0.136916	4.17332	3.00188e-05	0.000516112
AT2G21100	222.441	0.571666	0.158497	3.6068	0.000309999	0.00384279
AT1G23550	134.765	0.571902	0.178706	3.20023	0.00137316	0.0131934	SRO2
AT5G25090	151.373	0.572246	0.191129	2.99403	0.00275319	0.0232378	ENODL13
AT3G05600	255.436	0.572395	0.152582	3.75139	0.000175854	0.00233761
AT3G60510	226.062	0.572527	0.143139	3.99981	6.33932e-05	0.000971
AT3G59320	268.642	0.572737	0.146282	3.91529	9.02965e-05	0.00131791
AT3G60640	154.098	0.573503	0.159435	3.5971	0.00032179	0.00396678	ATG8G
AT3G58660	714.985	0.576016	0.111795	5.15243	2.57133e-07	7.2615e-06
AT4G00380	104.566	0.57666	0.190491	3.02723	0.00246808	0.0212074
AT1G22065	103.588	0.577105	0.202345	2.85209	0.00434327	0.0334074
AT3G59840	319.162	0.577283	0.114589	5.03787	4.70732e-07	1.26006e-05
AT3G60080	592.816	0.57746	0.0934751	6.17768	6.50491e-10	2.70078e-08
AT3G59410	613.337	0.57822	0.0886991	6.51889	7.08296e-11	3.37114e-09	GCN2
AT1G01600	267.281	0.579406	0.125568	4.61427	3.94485e-06	8.63971e-05	CYP86A4
AT5G59680	103.888	0.579412	0.206967	2.79954	0.00511756	0.037983
AT1G61580	727.852	0.580394	0.0914853	6.34412	2.23699e-10	1.01754e-08	RPL3B
AT3G59360	841.122	0.580425	0.0837004	6.93456	4.07496e-12	2.26549e-10	UTR6
AT3G60210	917.283	0.58079	0.0800268	7.25745	3.94455e-13	2.43588e-11
AT3G60850	456.706	0.581454	0.10305	5.64244	1.67658e-08	5.73978e-07
AT1G65150	111.711	0.583195	0.188367	3.09605	0.00196116	0.0176278
AT5G43380	105.426	0.584593	0.186644	3.13212	0.00173547	0.0160351	TOPP6
AT2G48140	487.782	0.585361	0.119298	4.90671	9.26163e-07	2.31707e-05	EDA4
AT3G59810	434.121	0.586358	0.106039	5.52963	3.20899e-08	1.04541e-06
AT1G62870	132.134	0.587059	0.175569	3.34375	0.000826528	0.00874194
AT5G59530	143.429	0.587192	0.203328	2.88791	0.00387811	0.0304939
AT5G63990	204.103	0.587295	0.141966	4.13688	3.52055e-05	0.000588689
AT1G54260	210.025	0.588933	0.141152	4.17234	3.01489e-05	0.000517437
AT3G61490	178.857	0.589972	0.154678	3.8142	0.000136623	0.00189137
AT1G76980	124.137	0.59128	0.19521	3.02894	0.00245415	0.0211229
AT4G04745	241.192	0.591531	0.141448	4.18195	2.89016e-05	0.000498661
AT3G03060	277.012	0.591826	0.142209	4.16166	3.15946e-05	0.000537991
AT3G60800	408.223	0.59235	0.105232	5.62898	1.81277e-08	6.17355e-07
AT5G53210	88.0776	0.592721	0.209312	2.83176	0.00462921	0.0350813	SPCH
AT5G60950	122.815	0.59313	0.177677	3.33825	0.00084307	0.0088736	COBL5
AT3G53230	892.33	0.593856	0.201576	2.94606	0.0032185	0.0263494
AT3G60740	644.409	0.595835	0.0917534	6.49388	8.36534e-11	3.97181e-09	TTN1
AT2G31865	99.9397	0.597538	0.20314	2.94151	0.00326615	0.0266454	PARG2
AT3G60480	176.494	0.59831	0.148118	4.03941	5.35863e-05	0.000842613
AT3G60840	268.803	0.599015	0.126116	4.74973	2.03688e-06	4.78311e-05	MAP65-4
AT5G17450	107.824	0.599201	0.193103	3.10301	0.00191563	0.0172903	HIPP21
AT3G15990	116.047	0.599759	0.181527	3.30396	0.000953301	0.00980639	SULTR3;4
AT4G16260	932.078	0.600143	0.0825684	7.26843	3.63677e-13	2.26735e-11
AT3G59800	247.71	0.601627	0.131029	4.59156	4.39937e-06	9.54943e-05
AT2G38640	104.434	0.603199	0.191752	3.14573	0.00165672	0.0154611
AT1G32450	904.919	0.603327	0.117012	5.1561	2.52145e-07	7.13095e-06	NRT1.5
AT2G47990	239.28	0.60414	0.159684	3.78336	0.000154728	0.00209533	SWA1
AT3G60600	1928.14	0.605119	0.0641943	9.42637	4.24545e-21	5.7135e-19	VAP27-1
AT3G16650	105.06	0.605749	0.206371	2.93524	0.00333286	0.0270876
AT3G59350	892.326	0.606752	0.0974706	6.22498	4.81633e-10	2.05209e-08
AT3G60240	4476.39	0.610612	0.0703427	8.68054	3.93896e-18	4.00338e-16	EIF4G
AT3G60620	767.529	0.61154	0.0852398	7.17434	7.26558e-13	4.37594e-11	CDS5
AT4G03320	198.04	0.612188	0.171762	3.56417	0.000365005	0.00439945	tic20-IV
AT3G59540	2343.58	0.61272	0.0763569	8.02443	1.02e-15	8.46991e-14
AT1G78170	322	0.613367	0.118158	5.19108	2.0908e-07	5.96488e-06
AT5G02810	75.9348	0.61456	0.220827	2.78299	0.00538599	0.0395121	PRR7
AT4G00080	184.574	0.615522	0.148851	4.13516	3.5471e-05	0.000592115	UNE11
AT2G22200	205.337	0.617069	0.144026	4.28442	1.83218e-05	0.000334768
AT3G11010	145.538	0.618345	0.192537	3.21156	0.00132017	0.0128488	AtRLP34
AT3G59920	3978.16	0.618582	0.061407	10.0735	7.23747e-24	1.23888e-21	ATGDI2
AT1G66725	130.817	0.619113	0.172137	3.59663	0.000322373	0.00397145	MIR163
AT2G47260	143.263	0.619334	0.186497	3.32088	0.000897329	0.00933436	WRKY23
AT4G32200	73.299	0.62111	0.223157	2.78329	0.00538107	0.0394909	ASY2
AT2G39350	300.376	0.621346	0.12956	4.79581	1.62023e-06	3.8794e-05
AT3G60720	109.61	0.622407	0.186959	3.32911	0.000871224	0.00910609	PDLP8
AT3G12860	134.699	0.622755	0.195126	3.19156	0.00141507	0.0135295
AT3G59640	253.717	0.623244	0.129778	4.80239	1.5678e-06	3.77239e-05
AT1G09240	224.277	0.624263	0.155931	4.00345	6.24247e-05	0.000959178	NAS3
AT5G23190	412.505	0.626063	0.121109	5.16944	2.34798e-07	6.66936e-06	CYP86B1
AT3G59370	166.395	0.626462	0.168413	3.7198	0.000199383	0.00261652
AT3G59660	865.008	0.63151	0.0811253	7.78439	7.00521e-15	5.4462e-13
AT4G37400	107.472	0.632878	0.194022	3.26189	0.0011067	0.0111263	CYP81F3
AT3G59870	496.311	0.633279	0.102059	6.20502	5.46891e-10	2.30001e-08
AT3G59280	743.581	0.634301	0.0849834	7.46382	8.40478e-14	5.63611e-12	TXR1
AT4G03500	85.6136	0.637945	0.212531	3.00165	0.00268518	0.0227425
AT5G48570	278.806	0.638584	0.142449	4.4829	7.36351e-06	0.000151894	ROF2
AT3G60820	2618.38	0.639064	0.0698712	9.14631	5.89103e-20	6.96713e-18	PBF1
AT3G60440	792.957	0.64166	0.0874783	7.33507	2.21607e-13	1.41321e-11
AT3G61110	3067.14	0.641669	0.0635139	10.1028	5.3683e-24	9.43757e-22	ARS27A
AT1G13910	86.455	0.643227	0.206178	3.11977	0.00180992	0.0165505
AT2G46660	100.99	0.644278	0.195536	3.29494	0.000984438	0.0100736	CYP78A6
AT5G13200	197.011	0.644743	0.166336	3.87614	0.000106127	0.00151276
AT4G35985	165.42	0.648549	0.171354	3.78484	0.000153809	0.00208578
AT2G30210	770.454	0.649746	0.209206	3.10576	0.00189788	0.0171857	LAC3
AT2G16890	249.288	0.651131	0.135789	4.79517	1.62534e-06	3.88688e-05
AT3G05470	138.352	0.652525	0.187176	3.48615	0.00049003	0.00561836
AT5G64550	580.495	0.654401	0.102956	6.35613	2.06902e-10	9.45545e-09
AT3G61240	1596.36	0.654633	0.0739249	8.85537	8.34066e-19	8.99224e-17
AT3G59990	1859.96	0.655034	0.0728018	8.9975	2.30922e-19	2.60474e-17	MAP2B
AT3G61410	76.1295	0.656241	0.219549	2.98904	0.00279856	0.0235392
AT3G59680	94.9438	0.658111	0.198193	3.32055	0.000898393	0.00933505
AT3G60590	332.695	0.658793	0.115034	5.72695	1.02252e-08	3.6213e-07
AT5G17040	103.945	0.659066	0.202514	3.25442	0.00113624	0.0113299
AT2G29090	278.525	0.659252	0.128954	5.11232	3.18227e-07	8.80835e-06	CYP707A2
AT4G01390	199.317	0.659621	0.172741	3.81855	0.00013424	0.00186445
AT3G60260	254.974	0.659804	0.131334	5.02387	5.06392e-07	1.34445e-05
AT3G61430	6382.97	0.662957	0.0648129	10.2288	1.47373e-24	2.76522e-22	PIP1A
AT3G44450	452.062	0.663347	0.11273	5.88437	3.99567e-09	1.50524e-07
AT3G11340	622.392	0.663581	0.116897	5.67662	1.3738e-08	4.7281e-07
AT3G48080	70.1057	0.664644	0.238087	2.79161	0.00524471	0.0387231
AT3G26170	71.1942	0.665359	0.230622	2.88506	0.0039134	0.0306938	CYP71B19
AT5G39850	212.253	0.665402	0.141899	4.68926	2.74195e-06	6.22893e-05
AT1G73600	9174.16	0.665424	0.0793515	8.38578	5.03918e-17	4.72762e-15
AT3G13940	323.877	0.666339	0.135108	4.9319	8.14316e-07	2.07178e-05
AT1G56650	106.27	0.667753	0.190289	3.50915	0.000449542	0.00522267	PAP1
AT4G14400	1329.34	0.668248	0.202101	3.30651	0.00094465	0.00972765	ACD6
AT5G09420	170.847	0.669	0.171736	3.89553	9.79863e-05	0.00141532	ATTOC64-V
AT1G49470	238.387	0.670114	0.134279	4.99044	6.02416e-07	1.57792e-05
AT4G01700	87.2988	0.671215	0.216303	3.10312	0.00191494	0.0172903
AT2G47460	196.814	0.674786	0.154503	4.36747	1.25695e-05	0.000241519	MYB12
AT1G71870	99.5695	0.675551	0.19553	3.45498	0.00055034	0.00621489
AT3G54590	1246.77	0.676203	0.0983256	6.87718	6.10475e-12	3.34629e-10	ATHRGP1
AT3G60110	173.68	0.67721	0.155506	4.35489	1.33134e-05	0.000254953
AT1G72490	87.6445	0.677983	0.20793	3.26063	0.00111166	0.0111495
AT3G10530	438.096	0.678709	0.133415	5.08722	3.63346e-07	9.95835e-06
AT2G40370	165.299	0.679671	0.176137	3.85876	0.000113963	0.0016115	LAC5
AT3G60690	317.078	0.680117	0.119155	5.70785	1.14413e-08	4.01555e-07
AT3G20810	1938.39	0.680722	0.0886604	7.67786	1.61768e-14	1.19573e-12	JMJD5
AT3G62820	206.714	0.684512	0.141541	4.83615	1.32379e-06	3.23309e-05
AT3G61270	215.002	0.687284	0.145704	4.717	2.39346e-06	5.52079e-05
AT2G27660	137.567	0.68824	0.189907	3.62409	0.000289986	0.00362742
AT5G02430	92.6579	0.688314	0.198059	3.4753	0.000510278	0.00582655
AT3G60180	73.1145	0.69117	0.228197	3.02883	0.00245499	0.0211229
AT1G51380	63.3745	0.692296	0.248828	2.78223	0.00539871	0.0395608
AT4G08410	183.912	0.694099	0.154215	4.50085	6.76826e-06	0.000141107
AT3G61320	502.883	0.69689	0.102975	6.76759	1.30941e-11	6.81383e-10
AT3G20820	2130.75	0.697153	0.0698344	9.98295	1.81008e-23	3.01896e-21
AT3G60960	140.435	0.697162	0.165812	4.20454	2.61613e-05	0.00045663
AT4G23600	3573.32	0.69885	0.0931845	7.49964	6.39923e-14	4.39699e-12	CORI3
AT4G23496	150.472	0.700371	0.165841	4.22315	2.40909e-05	0.00042238	SP1L5
AT3G15357	71.4496	0.70093	0.231362	3.02958	0.00244893	0.0210893
AT3G02020	1987.06	0.700973	0.0688422	10.1823	2.37855e-24	4.37878e-22	AK3
AT2G20440	179.919	0.703057	0.15542	4.5236	6.07962e-06	0.000127842
AT3G60770	4395.94	0.707509	0.0689601	10.2597	1.07046e-24	2.02805e-22
AT3G59760	1753.28	0.709559	0.0711838	9.96799	2.10451e-23	3.48029e-21	OASC
AT3G20380	98.8314	0.710548	0.214608	3.31091	0.000929922	0.00959624
AT5G56250	403.733	0.710716	0.110972	6.40448	1.50879e-10	6.98153e-09	HAP8
AT2G26695	151.067	0.711291	0.164716	4.31829	1.5724e-05	0.000294471
AT2G12190	93.2767	0.711467	0.208272	3.41605	0.000635374	0.00698911
AT4G08300	335.289	0.712279	0.140782	5.05946	4.20445e-07	1.13793e-05
AT3G60880	590.54	0.712366	0.101685	7.00562	2.45888e-12	1.41126e-10	DHDPS
AT3G56260	109.749	0.712552	0.195845	3.63835	0.000274387	0.00346562
AT5G05960	767.659	0.713172	0.10176	7.0084	2.41054e-12	1.38759e-10
AT5G06090	66.9291	0.713682	0.245406	2.90817	0.00363548	0.0290154	ATGPAT7
AT3G60500	470.863	0.713926	0.112736	6.3327	2.40906e-10	1.08569e-08	CER7
AT3G61100	134.649	0.715383	0.187955	3.80615	0.000141149	0.00194794
AT4G01080	922.098	0.718231	0.0846423	8.48548	2.14835e-17	2.08572e-15	TBL26
AT4G38780	98.4884	0.719542	0.205171	3.50703	0.000453131	0.00525083
AT1G05340	107.672	0.723001	0.214685	3.36773	0.000757887	0.00811268
AT3G59400	62.0744	0.72389	0.240374	3.01152	0.00259943	0.0221508	GUN4
AT1G09932	73.2142	0.724125	0.234782	3.08425	0.00204066	0.0181833
AT1G69230	110.636	0.727702	0.20482	3.55288	0.000381039	0.00455055	SP1L2
AT3G61370	157.189	0.728807	0.158817	4.58898	4.45415e-06	9.64686e-05
AT5G01330	58.5166	0.73348	0.250947	2.92284	0.0034685	0.0279572	PDC3
AT3G60050	145.273	0.737256	0.169448	4.35093	1.35564e-05	0.000258592
AT3G59630	322.752	0.737292	0.1179	6.25354	4.01247e-10	1.74386e-08
AT3G61140	896.943	0.737923	0.0913226	8.0804	6.45534e-16	5.47693e-14	FUS6
AT1G02930	1157.84	0.738703	0.199806	3.6971	0.00021808	0.00283518	GSTF6
AT1G04220	154.383	0.739958	0.163033	4.5387	5.66009e-06	0.000119536	KCS2
AT3G59150	124.463	0.742711	0.175349	4.23561	2.27929e-05	0.000403246
AT3G04620	86.1759	0.743051	0.213746	3.47632	0.000508345	0.00580787
AT1G06080	100.494	0.74313	0.243409	3.05301	0.00226561	0.0197636	ADS1
AT5G59670	195.287	0.743756	0.153146	4.85651	1.1947e-06	2.9399e-05
AT2G22590	223.608	0.745066	0.136734	5.44901	5.06515e-08	1.60718e-06
AT3G59890	186.688	0.745248	0.152999	4.87092	1.11078e-06	2.74376e-05
AT3G22235	107.003	0.745518	0.24884	2.99597	0.00273575	0.0231206
AT3G61360	61.0322	0.751935	0.246308	3.05283	0.00226696	0.0197665
AT3G59700	122.342	0.754121	0.18321	4.11616	3.85244e-05	0.000635474	ATHLECRK
AT3G55710	222.644	0.754253	0.15628	4.82629	1.39103e-06	3.37619e-05
AT3G60360	293.472	0.756228	0.13019	5.80863	6.29875e-09	2.30608e-07	EDA14
AT3G60900	179.641	0.756695	0.168493	4.49095	7.09067e-06	0.000147199	FLA10
AT5G03995	46.0446	0.759618	0.278326	2.72924	0.00634813	0.044779
AT3G61380	315.795	0.761239	0.118952	6.39956	1.55827e-10	7.18869e-09
AT3G60630	742.377	0.765936	0.0838433	9.13532	6.52125e-20	7.666e-18	HAM2
AT3G60245	7118.09	0.766894	0.0652304	11.7567	6.52335e-32	2.02058e-29
AT5G20190	805.51	0.768328	0.0826671	9.29424	1.4826e-20	1.87866e-18
AT3G61460	735.06	0.771393	0.0890902	8.65856	4.7776e-18	4.83057e-16	BRH1
AT4G08780	45.0357	0.773595	0.287345	2.69222	0.00709785	0.0486674
AT3G27150	125.64	0.775021	0.180713	4.28868	1.79738e-05	0.000329025
AT1G02400	141.026	0.775741	0.168522	4.60319	4.16066e-06	9.07164e-05	ATGA2OX4
AT3G59100	692.937	0.777541	0.0874731	8.88892	6.17085e-19	6.76505e-17	ATGSL11
AT5G01100	83.0375	0.777803	0.216039	3.6003	0.00031785	0.00392814
AT3G59430	132.965	0.780825	0.168799	4.62576	3.73231e-06	8.20184e-05
AT1G02220	111.349	0.781596	0.191934	4.07222	4.65675e-05	0.000746978	ANAC003
AT3G20600	135.709	0.782739	0.166407	4.70375	2.55427e-06	5.84339e-05	NDR1
AT5G60760	73.2096	0.787969	0.238985	3.29715	0.000976724	0.0100157
AT5G49770	51.2426	0.788472	0.278125	2.83495	0.00458324	0.0347735
AT4G12470	1064.1	0.789235	0.114957	6.86545	6.6283e-12	3.6231e-10	AZI1
AT3G16330	91.0594	0.791593	0.206915	3.82569	0.000130409	0.00181901
AT3G20680	681.865	0.791924	0.096567	8.20077	2.38855e-16	2.12831e-14
AT1G02920	741.919	0.79295	0.24665	3.21488	0.00130499	0.0127264	ATGSTF7
AT3G60980	239.131	0.793951	0.133609	5.94236	2.80941e-09	1.08559e-07
AT5G16900	49.0539	0.795089	0.272191	2.92107	0.00348835	0.0280823
AT3G25190	191.12	0.7954	0.150606	5.28132	1.28257e-07	3.80365e-06
AT1G57630	55.4402	0.798702	0.291848	2.7367	0.00620583	0.0440365
AT1G53270	86.0739	0.798913	0.223306	3.57765	0.000346695	0.0042231
AT5G10300	101.36	0.802445	0.198701	4.03846	5.3804e-05	0.000845355	ATMES5
AT2G29500	218.063	0.802494	0.136098	5.89643	3.71446e-09	1.40201e-07
AT5G42530	3388.11	0.812148	0.205866	3.94503	7.979e-05	0.0011868
AT3G60830	457.667	0.817172	0.105567	7.74076	9.8825e-15	7.56263e-13	ATARP7
AT3G61920	46.2607	0.817744	0.288719	2.83231	0.00462125	0.0350346
AT1G16090	88.9897	0.817961	0.206435	3.96233	7.4223e-05	0.001115	WAKL7
AT1G73630	115.297	0.819219	0.182923	4.47849	7.51744e-06	0.000154286
AT2G32190	62.6359	0.820502	0.269808	3.04106	0.00235745	0.0204368
AT2G14510	38.113	0.821769	0.305067	2.69373	0.00706568	0.048515
AT3G03640	693.364	0.823463	0.0979452	8.40738	4.19263e-17	3.9716e-15	GLUC
AT3G60150	46.3066	0.823697	0.285293	2.8872	0.00388686	0.0305347
AT3G60660	60.3975	0.825631	0.253329	3.25913	0.00111754	0.0111834
AT5G19410	198.3	0.826832	0.16418	5.03614	4.75005e-07	1.26976e-05
AT3G20910	189.538	0.831028	0.149198	5.56997	2.54784e-08	8.44117e-07	NF-YA9
AT1G63530	83.8958	0.831106	0.212739	3.9067	9.35638e-05	0.00136051
AT3G60450	617.596	0.831245	0.0990382	8.39317	4.73204e-17	4.46092e-15
AT5G43620	44.9425	0.831271	0.306109	2.7156	0.00661554	0.046132
AT4G36430	181.933	0.838004	0.191509	4.37579	1.20995e-05	0.000233339
AT5G05365	44.9445	0.843532	0.285161	2.95809	0.00309552	0.0255633
AT5G08600	151.477	0.847288	0.188385	4.49764	6.87106e-06	0.000142944
AT1G73325	84.0103	0.849093	0.216606	3.91998	8.85554e-05	0.00129844
AT3G59750	44.5207	0.850869	0.305463	2.78551	0.00534438	0.0393077
AT1G10340	60.9759	0.857237	0.285358	3.00407	0.00266392	0.0226148
AT5G36790	36.563	0.861355	0.321147	2.68212	0.00731572	0.0497418
AT2G18470	72.0905	0.867834	0.23579	3.68053	0.000232748	0.00300187	PERK4
AT3G60330	409.827	0.868249	0.11557	7.51274	5.79026e-14	4.00678e-12	HA7
AT3G59650	236.143	0.869862	0.139208	6.24866	4.13988e-10	1.79524e-08
AT1G52770	113.447	0.870188	0.193153	4.50516	6.63222e-06	0.000138567
AT3G51660	207.496	0.874097	0.167359	5.22289	1.76152e-07	5.10006e-06
AT2G02990	41.0515	0.876166	0.313492	2.79486	0.00519228	0.0384087	RNS1
AT2G26010	356.008	0.876428	0.298731	2.93384	0.00334797	0.0271765	PDF1.3
AT1G52690	60.6761	0.883185	0.249018	3.54666	0.000390142	0.00463656
AT3G22840	332.835	0.886827	0.134021	6.61705	3.66433e-11	1.79663e-09	ELIP1
AT5G60250	69.9696	0.887636	0.243107	3.65122	0.000261	0.0033137
AT3G20830	244.129	0.889204	0.13392	6.63982	3.14065e-11	1.5555e-09
AT3G20740	528.773	0.891393	0.10108	8.81869	1.15808e-18	1.22819e-16	FIE
AT4G10310	74.4974	0.891716	0.235916	3.7798	0.000156955	0.00212106	HKT1
AT3G55110	156.231	0.891914	0.173499	5.14075	2.7365e-07	7.69759e-06
AT1G65620	57.1963	0.893163	0.271137	3.29413	0.000987253	0.0100885	AS2
AT3G20550	571.353	0.895959	0.0961988	9.31361	1.23558e-20	1.57588e-18	DDL
AT1G13340	209.675	0.901372	0.319543	2.82081	0.00479021	0.0360633
AT3G09350	551.532	0.90253	0.220185	4.09896	4.15015e-05	0.00067601	Fes1A
AT1G45616	47.8155	0.903265	0.290614	3.10812	0.00188281	0.0171075	AtRLP6
AT1G24260	42.7656	0.90579	0.310431	2.91785	0.00352453	0.0283152	SEP3
AT1G56660	223.48	0.905837	0.154754	5.8534	4.81614e-09	1.77918e-07
AT3G20770	3212.95	0.90666	0.0712793	12.7198	4.58931e-37	1.99013e-34	EIN3
AT3G20720	977.649	0.906956	0.0801227	11.3196	1.04957e-29	2.80567e-27
AT1G73700	40.6101	0.907479	0.299022	3.03483	0.00240673	0.0207994
AT3G20570	369.716	0.911284	0.115929	7.86072	3.81931e-15	3.02968e-13	ENODL9
AT5G60900	32.6749	0.913276	0.333805	2.73596	0.00621987	0.0440561	RLK1
AT3G15650	159.693	0.913642	0.171776	5.3188	1.04456e-07	3.15048e-06
AT3G20640	122.528	0.927054	0.188094	4.92867	8.27922e-07	2.10365e-05
AT2G46440	79.6225	0.927835	0.256859	3.61224	0.000303561	0.00377305	ATCNGC11
AT4G26950	55.975	0.929725	0.266545	3.48806	0.000486541	0.00558786
AT3G20930	806.153	0.930779	0.0879689	10.5808	3.65924e-26	7.59642e-24
AT5G65300	39.5058	0.931022	0.316648	2.94024	0.0032796	0.0267215
AT2G21650	39.737	0.936582	0.322554	2.90365	0.00368845	0.0293662	MEE3
AT3G20790	1385.65	0.938069	0.0770924	12.1681	4.5957e-34	1.60144e-31
AT4G39670	86.8754	0.943525	0.237387	3.97462	7.04904e-05	0.00106467
AT2G45900	129.825	0.947347	0.190969	4.96074	7.02265e-07	1.81992e-05
AT1G65390	41.2625	0.953102	0.345979	2.7548	0.00587281	0.0421796	ATPP2-A5
AT1G67148	36.0699	0.954709	0.321144	2.97284	0.00295059	0.024543
AT1G02800	49.4671	0.955063	0.327859	2.91303	0.00357939	0.0286733	ATCEL2
AT5G62520	42.4804	0.959006	0.312573	3.0681	0.00215426	0.0189875	SRO5
AT3G20540	1056.65	0.973103	0.0820731	11.8565	1.99036e-32	6.69654e-30	POLGAMMA1
AT5G35480	71.3122	0.97534	0.230251	4.23598	2.27556e-05	0.000402951
AT3G20560	473.986	0.980033	0.102322	9.57791	9.90325e-22	1.4315e-19	ATPDIL5-3
AT3G59220	419.904	0.982185	0.110856	8.86	8.0011e-19	8.72254e-17	PRN
AT3G20780	328.931	0.983904	0.120447	8.16876	3.11569e-16	2.72644e-14	ATTOP6B
AT3G27660	42.9453	0.985023	0.301074	3.2717	0.00106904	0.0107866	OLEO4
AT3G22910	164.378	0.991722	0.364603	2.72001	0.00652806	0.0456426
AT2G29170	47.1847	0.994084	0.287671	3.45563	0.000549011	0.00621012
AT1G66500	76.4115	0.994089	0.231751	4.28948	1.79094e-05	0.000328462
AT4G11890	79.5111	0.994642	0.243387	4.08667	4.3761e-05	0.0007075
AT2G41730	75.2807	0.994982	0.239485	4.15468	3.25748e-05	0.000551314
AT2G20142	67.4679	1.00154	0.303223	3.30299	0.000956614	0.0098301
AT4G36010	104.718	1.00345	0.20714	4.84429	1.27067e-06	3.11507e-05
AT1G60095	57.4247	1.00357	0.253707	3.95562	7.63355e-05	0.00114234
AT1G52270	40.7881	1.01065	0.328965	3.07222	0.00212474	0.0187876
AT1G11700	244.431	1.01361	0.135574	7.47647	7.63451e-14	5.15501e-12
AT3G20630	1595.42	1.02025	0.0888516	11.4826	1.61339e-30	4.56286e-28	UBP14
AT3G20670	665.6	1.02453	0.0974828	10.5098	7.78199e-26	1.56554e-23	HTA13
AT2G01020	35.7256	1.0247	0.32971	3.10788	0.00188436	0.0171109
AT3G59820	1090.76	1.03248	0.0996368	10.3624	3.67529e-25	7.10096e-23
AT1G52700	76.0571	1.03332	0.257888	4.00687	6.15275e-05	0.000948379
AT2G41480	111.681	1.03454	0.184703	5.6011	2.12995e-08	7.1512e-07
AT3G20870	882.694	1.03512	0.0823272	12.5732	2.96339e-36	1.20474e-33	ZTP29
AT3G20650	428.307	1.03631	0.110376	9.3889	6.06309e-21	8.10378e-19
AT5G59320	155.738	1.0417	0.212211	4.90876	9.1652e-07	2.29714e-05	LTP3
AT3G20800	934.106	1.04341	0.0802834	12.9966	1.27927e-38	6.40093e-36
AT1G47510	29.3071	1.04474	0.384148	2.71963	0.00653543	0.0456615	5PTASE11
AT5G37440	26.439	1.04543	0.384144	2.72144	0.00649975	0.0455099
AT1G15010	75.8952	1.05116	0.274273	3.83253	0.000126832	0.00177801
AT1G35230	40.2195	1.05279	0.31698	3.32132	0.000895942	0.00932946	AGP5
AT3G13784	74.3079	1.05445	0.277414	3.80101	0.000144109	0.00198039	AtcwINV5
AT1G56060	56.83	1.0615	0.296957	3.57458	0.000350787	0.00425965
AT3G20890	379.075	1.06237	0.111741	9.50742	1.95443e-21	2.66704e-19
AT5G56080	32.122	1.06331	0.371049	2.86568	0.00416111	0.0322863	ATNAS2
AT3G42180	50.1775	1.06478	0.278516	3.82306	0.000131807	0.00183589
AT3G46090	85.0341	1.07332	0.248958	4.31125	1.62333e-05	0.000301979	ZAT7
AT3G20920	940.155	1.07454	0.0814902	13.1861	1.05439e-39	5.41458e-37
AT5G22460	57.0934	1.07847	0.265207	4.06652	4.77204e-05	0.000763292
AT2G02010	145.161	1.07973	0.178887	6.03581	1.58167e-09	6.29891e-08	GAD4
AT3G62460	163.842	1.08556	0.156876	6.91987	4.52062e-12	2.49196e-10
AT2G04050	32.5517	1.08985	0.354253	3.07648	0.00209459	0.0185875
AT3G26200	46.7653	1.09051	0.307997	3.54064	0.000399157	0.00472929	CYP71B22
AT2G18193	137.676	1.11163	0.178332	6.23346	4.56253e-10	1.96541e-08
AT2G32210	56.3694	1.1127	0.259222	4.29247	1.767e-05	0.000325295
AT1G43910	355.089	1.12216	0.137416	8.16612	3.18465e-16	2.77434e-14
AT3G20620	315.403	1.12775	0.120982	9.32165	1.14549e-20	1.4706e-18
AT2G36295	38.9225	1.1305	0.319957	3.53329	0.000410418	0.00484506
AT5G62210	775.755	1.1306	0.215974	5.2349	1.65075e-07	4.80786e-06
AT3G63380	205.338	1.13535	0.397692	2.85484	0.0043058	0.0331715
AT3G59670	550.866	1.14266	0.124696	9.16361	5.01874e-20	6.00832e-18
AT5G07570	55.45	1.14318	0.266501	4.28959	1.79e-05	0.000328462
AT3G28540	73.5441	1.14337	0.282122	4.05277	5.06144e-05	0.000802999
AT1G65480	95.8226	1.14709	0.217418	5.27595	1.32068e-07	3.91073e-06	FT
AT2G18480	38.3517	1.14929	0.324158	3.54547	0.000391916	0.00465481
AT2G28270	33.0875	1.15111	0.341479	3.37095	0.000749097	0.00802739
AT5G02490	1440.99	1.15152	0.190472	6.04561	1.48848e-09	5.96431e-08
AT4G04490	38.5673	1.15532	0.337657	3.42157	0.000622609	0.00687194	CRK36
AT3G48850	40.8955	1.15645	0.357631	3.23364	0.00122222	0.0120396	PHT3;2
AT3G61190	78.4844	1.16004	0.228867	5.06862	4.00708e-07	1.08905e-05	BAP1
AT2G26020	54.773	1.16704	0.324814	3.59296	0.000326948	0.00401514	PDF1.2b
AT3G01600	22.7369	1.16824	0.408166	2.86217	0.00420751	0.0325675	anac044
AT1G64940	44.474	1.16936	0.322135	3.63002	0.000283402	0.00355647	CYP89A6
AT4G01360	29.1681	1.17214	0.373722	3.13639	0.00171044	0.0158563
AT3G60160	205.765	1.17465	0.143689	8.17494	2.96002e-16	2.60189e-14	ATMRP9
AT4G23210	145.736	1.17492	0.418328	2.8086	0.00497581	0.0371738	CRK13
AT5G64060	39.6532	1.17663	0.341034	3.4502	0.00056018	0.00630413	anac103
AT4G35190	23.3592	1.18125	0.412263	2.86528	0.00416636	0.0323141
AT3G20860	318.106	1.18608	0.130749	9.07145	1.17446e-19	1.35612e-17	ATNEK5
AT5G61160	241.606	1.204	0.336843	3.57438	0.000351062	0.00426033	AACT1
AT5G35490	51.0632	1.20495	0.27125	4.44221	8.90383e-06	0.000179308	ATMRU1
AT3G04420	34.6759	1.21887	0.340783	3.57668	0.000347982	0.00423349	anac048
AT3G46080	72.2823	1.22215	0.283731	4.30743	1.65164e-05	0.000306369
AT3G59250	59.5291	1.22236	0.268974	4.54453	5.50576e-06	0.000116738
AT4G22214	21.2366	1.22805	0.4566	2.68955	0.00715484	0.0489207
AT3G20935	39.1702	1.2423	0.318016	3.90641	9.36782e-05	0.00136116	CYP705A28
AT1G43605	42.2403	1.24334	0.316877	3.92374	8.71855e-05	0.00128306
AT3G25180	25.3555	1.26066	0.443036	2.8455	0.00443412	0.0339325	CYP82G1
AT1G07167	46.7346	1.26212	0.294649	4.28347	1.83998e-05	0.000335564
AT3G20960	241.207	1.27113	0.135731	9.36504	7.60209e-21	9.95618e-19	CYP705A33
AT5G52640	1311.71	1.28259	0.350415	3.6602	0.000252018	0.0032172	HSP81-1
AT2G38250	35.7917	1.28677	0.346531	3.71329	0.000204581	0.00267933
AT5G20710	21.4422	1.29041	0.426687	3.02426	0.00249241	0.0213838	BGAL7
AT3G59930	43.6252	1.33348	0.293689	4.54045	5.61331e-06	0.000118676
AT5G42380	45.7894	1.33406	0.337059	3.95795	7.55944e-05	0.00113299	CML39
AT3G20730	27.2662	1.33744	0.391707	3.41439	0.000639249	0.00702382
AT4G06746	72.8916	1.34992	0.2547	5.30004	1.1578e-07	3.47589e-06	RAP2.9
AT3G60280	39.827	1.35287	0.319076	4.23995	2.23571e-05	0.000396616	UCC3
AT3G12320	16.1635	1.35674	0.485524	2.79439	0.00519973	0.0384493
AT3G09680	14.9879	1.37049	0.507892	2.69839	0.00696763	0.0480107
AT2G33020	26.3856	1.41121	0.416688	3.38674	0.000707278	0.00765493	AtRLP24
AT4G14630	16.869	1.41375	0.479881	2.94605	0.00321863	0.0263494	GLP9
AT5G13210	79.6997	1.42022	0.245597	5.78274	7.34955e-09	2.64611e-07
AT1G18830	16.882	1.43236	0.485877	2.94799	0.00319849	0.026247
AT3G27940	17.9996	1.44464	0.467653	3.08912	0.00200747	0.017945	LBD26
AT5G26320	15.2139	1.44563	0.515569	2.80396	0.00504798	0.0376553
AT1G49920	18.2636	1.44683	0.462833	3.12602	0.00177187	0.0162865
AT1G44050	19.2395	1.44701	0.468097	3.09126	0.0019931	0.0178656
AT2G39330	49.2357	1.45197	0.362899	4.00103	6.30683e-05	0.000966783	JAL23
AT5G60910	35.2086	1.45646	0.344425	4.22868	2.35065e-05	0.000414369	AGL8
AT5G43980	32.0568	1.47049	0.359609	4.08914	4.32971e-05	0.000701744	PDLP1
AT1G49860	397.224	1.48797	0.486381	3.05926	0.00221887	0.0194428	ATGSTF14
AT1G69880	28.1534	1.50747	0.427968	3.52239	0.000427675	0.00500639	ATH8
AT3G16150	91.967	1.51498	0.217056	6.9797	2.95814e-12	1.67319e-10
AT3G05660	16.3615	1.53385	0.50776	3.02081	0.00252096	0.0215756	AtRLP33
AT3G55970	24.2168	1.54148	0.461944	3.33694	0.000847063	0.00890123	ATJRG21
AT2G40340	45.1806	1.54556	0.330015	4.68331	2.8228e-06	6.36811e-05	DREB2C
AT3G59900	28.9256	1.583	0.369011	4.28984	1.78798e-05	0.000328462	ARGOS
AT3G20865	12.1905	1.58492	0.573105	2.7655	0.00568359	0.0411997	AGP40
AT3G20590	12.3401	1.58753	0.581939	2.728	0.00637198	0.0448567
AT4G20970	13.738	1.59234	0.589792	2.69983	0.00693747	0.0478807
AT5G08250	67.6497	1.59979	0.255572	6.25967	3.85784e-10	1.6804e-08
AT3G30720	135.013	1.60226	0.185694	8.62852	6.21532e-18	6.21978e-16	QQS
AT2G21640	87.077	1.6153	0.236665	6.82526	8.77638e-12	4.6793e-10
AT3G20940	74.8109	1.61687	0.259486	6.23105	4.63322e-10	1.98274e-08	CYP705A30
AT5G24200	90.0024	1.63033	0.257739	6.32551	2.52403e-10	1.13004e-08
AT5G46140	16.864	1.64883	0.485827	3.39386	0.000689138	0.00747934
AT3G18610	158.302	1.6727	0.216333	7.7321	1.05789e-14	8.00142e-13	PARLL1
AT1G80130	62.1687	1.67495	0.262835	6.37265	1.85787e-10	8.53048e-09
AT3G62610	17.9155	1.75251	0.488991	3.58393	0.000338469	0.0041358	ATMYB11
AT4G23130	21.4787	1.76564	0.439447	4.01786	5.87289e-05	0.000910998	CRK5
AT5G37300	20.6399	1.76689	0.460846	3.83402	0.000126064	0.00176852	WSD1
AT3G28210	170.005	1.78357	0.360053	4.95362	7.28436e-07	1.88274e-05	PMZ
AT2G01422	16.0101	1.80148	0.533898	3.3742	0.000740315	0.00795513
AT4G31520	25.257	1.81746	0.424176	4.28468	1.83003e-05	0.000334688
AT2G14560	298.897	1.82253	0.5134	3.54992	0.000385347	0.00458796	LURP1
AT1G52800	13.813	1.83603	0.571177	3.21447	0.00130685	0.0127382
AT2G05914	14.8416	1.8371	0.521746	3.52106	0.000429829	0.00502257
AT5G01380	26.5266	1.88536	0.413868	4.55546	5.22718e-06	0.000111276
AT1G44130	12.2932	1.89312	0.592327	3.19607	0.00139313	0.0133328
AT1G13480	31.1969	1.92927	0.383574	5.02972	4.91192e-07	1.30587e-05
AT1G66390	36.1795	1.93394	0.353458	5.47147	4.46309e-08	1.43009e-06	ATMYB90
AT2G29350	55.7391	1.93557	0.327834	5.90411	3.54557e-09	1.34607e-07	SAG13
AT1G75600	14.5549	2.00733	0.569025	3.52767	0.000419238	0.00493427
AT4G15210	116.48	2.0436	0.237128	8.61815	6.80451e-18	6.77466e-16	ATBETA-AMY
AT3G46230	12.2278	2.04784	0.59183	3.46018	0.00053981	0.00611367	ATHSP17.4
AT5G64750	41.923	2.06199	0.383362	5.37872	7.50178e-08	2.30899e-06	ABR1
AT1G13470	13.9911	2.08721	0.648016	3.22093	0.00127777	0.0125298
AT1G61800	87.6133	2.10896	0.230898	9.13373	6.618e-20	7.73315e-18	GPT2
AT1G77960	13.6838	2.12568	0.572208	3.71487	0.000203307	0.00266443
AT5G40010	37.9859	2.29744	0.381451	6.02291	1.71312e-09	6.79467e-08	AATP1
AT1G07400	143.721	2.34746	0.213448	10.9978	3.91501e-28	9.31676e-26
AT5G44420	139.838	2.40005	0.452656	5.30215	1.14447e-07	3.44116e-06	PDF1.2
AT2G05995	12.8315	2.4972	0.603999	4.13444	3.55822e-05	0.000593463
AT1G71000	34.2712	2.55884	0.394183	6.49148	8.49946e-11	4.02569e-09
AT4G33720	28.8547	2.57668	0.486815	5.29293	1.20369e-07	3.59156e-06
AT3G01345	18.6618	2.62345	0.540899	4.85018	1.23351e-06	3.03157e-05
AT5G44430	111.833	2.70907	0.60385	4.48634	7.24588e-06	0.000149625	PDF1.2c
AT1G53540	37.0229	2.73391	0.387246	7.05987	1.66662e-12	9.79592e-11
AT1G49900	12.4588	2.76508	0.641218	4.31224	1.61612e-05	0.000300925
AT1G70440	42.9242	2.92816	0.364834	8.026	1.00703e-15	8.39798e-14	SRO3
AT5G12030	70.4212	2.99593	0.319626	9.37323	7.03456e-21	9.33826e-19	AT-HSP17.6A
AT3G61400	28.3169	3.00442	0.470152	6.39032	1.6554e-10	7.61877e-09
AT5G59310	19.7213	3.08883	0.548979	5.62651	1.83895e-08	6.23885e-07	LTP4
AT5G12020	47.9267	3.33554	0.381572	8.74158	2.29872e-18	2.3734e-16	HSP17.6II
AT4G13420	50.9777	3.37068	0.381282	8.84038	9.53921e-19	1.0172e-16	HAK5
AT4G25200	22.0736	3.50431	0.586125	5.97878	2.24811e-09	8.82688e-08	ATHSP23.6-MITO
AT5G50790	21.8101	3.625	0.573113	6.3251	2.53064e-10	1.13004e-08	SWEET10
AT1G75945	25.8082	4.96425	0.730178	6.79869	1.05574e-11	5.55302e-10
AT1G64795	13.8021	6.29305	1.26784	4.96362	6.91929e-07	1.79791e-05
