# Supplementary material for: H3K27me3 demethylases regulate flowering time response to low ambient temperature
Source: Research Square preprint supplement (doi:10.21203/rs.3.rs-5893753/v1), 2025-02-05
Supplement: Supplementary file 2 [file b038f1ad34fb2f7b49add249.docx]

**Supplementary Table S1.** List of genotypes used in this work.

| Genotype | Mutation | Identifier | Reference |
| --- | --- | --- | --- |
| *elf6-3* | T-DNA | SALK_074694 | Noh *et al.*, 2004 |
| *jmj13-1* | T-DNA | GABI-Kat 113B06 | Yang *et al.*, 2016 |
| *ref6-c* | deletion | CRISPR/Cas9 | Yan *et al.*, 2018 |
| *elf6-3 jmj13-1* | T-DNA | - | This work |
| *elf6-3 ref6-c jmj13-1* | T-DNA | - | Yan *et al.*, 2018 |
| *flc-3* | deletion | fast-neutron | Michaels *et at*. 1999 |
| *flm-3* | T-DNA | SALK_141971 | Balasubramanian *et al.*, 2006 |
| *flm-5* | T-DNA | SALK_056258 | This work |
| *maf2-2* | T-DNA | SALK_045623 | Gu *et al.*, 2013 |
| *elf6-3 ref6-c jmj13-1 flc-3* | T-DNA | - | This work |
| *elf6-3 ref6-c jmj13-1 flm-* | T-DNA | - | This work |
| *elf6-3 ref6-c jmj13-1 maf2-2* | T-DNA | - | This work |
